# Supplementary material for: Distinct microRNA Expression Profiles in Mouse Renal Cortical Tissue after 177Lu-octreotate Administration
Source: PubMed Central journal article supplement (PMC4227842; doi:10.1371/journal.pone.0112645), 2014-11-11
Supplement: pone.0112645.s001.pdf [file pone.0112645.s001.pdf]

**Table S1. Radiation-responsive miRNAs**

miRNAs which have previously been found to be regulated after exposure to ionizing radiation. Also presented is at which absorbed doses and times after irradiation these miRNAs have previously been found affected, together with radiation source and in which cell line/tissue it has been studied as well as its regulation. Complete reference list are presented at bottom of table

| miRNA     | Absorbed dose            | Time          | Radiation source | Cell line/Tissue             | Regulation | Reference               |
|-----------|--------------------------|---------------|------------------|------------------------------|------------|-------------------------|
| let-7a    | 0.25, 0.5, 1, 3, 5, 10Gy | 1h            | Co-60            | NorHuFib                     | -          | Simone, Soule 2009      |
| let-7a    | 0.2, 2Gy                 | 0.5, 48, 168h | gamma            | human 3D tissue system       | +/-        | Dickey, Zemp 2011       |
| let-7a    | 2.5Gy                    | 2, 8, 24h     | gamma            | CRL2741                      | -          | Weidhaas, Babar 2007    |
| let-7a    | 2.5Gy                    | 2, 8, 24h     | gamma            | A549                         | -          | Weidhaas, Babar 2007    |
| let-7a    | 1, 10Gy                  | 24h           | Cs-137           | B lymphoblasts IM9           | -          | Cha, Shin 2009          |
| let-7a    | 2.5Gy                    | 6h            | 90 kV x-ray      | Male mouse spleen            | +          | Ilnytsky, Zemp 2008     |
| let-7b    | 0.25, 0.5, 1, 3, 5, 10Gy | 1h            | Co-60            | NorHuFib                     | -          | Simone, Soule 2009      |
| let-7b    | 0.2, 2Gy                 | 0.5, 48h      | gamma            | human 3D tissue system       | -          | Dickey, Zemp 2011       |
| let-7b    | 2.5Gy                    | 2, 8, 24h     | gamma            | CRL2741                      | -          | Weidhaas, Babar 2007    |
| let-7b    | 2.5Gy                    | 2, 8, 24h     | gamma            | A549                         | -          | Weidhaas, Babar 2007    |
| let-7b-5p | 6Gy                      | 3h            | Cs-137           | differentiated keratinocytes | +          | Joly-Tonetti, Vinuelas  |
| let-7c    | 0.2, 2Gy                 | 0.5, 48, 168h | gamma            | human 3D tissue system       | -          | Dickey, Zemp 2011       |
| let-7c    | 1, 10Gy                  | 4, 24h        | Cs-137           | Normal thyroid cells         | +          | Nikiforova, Gandhi 2011 |
| let-7c    | 2.5Gy                    | 2, 8, 24h     | gamma            | CRL2741                      | -          | Weidhaas, Babar 2007    |
| let-7c    | 2.5Gy                    | 2, 8, 24h     | gamma            | A549                         | -          | Weidhaas, Babar 2007    |
| let-7c    | 1Gy                      | 24h           | Cs-137           | B lymphoblasts IM9           | -          | Cha, Shin 2009          |
| let-7c    | 10 Gy                    | 5, 15, 40h    | gamma            | PC3                          | -          | Leung, Li 2014          |
| let-7d    | 0.25, 0.5, 1, 3, 5, 10Gy | 1h            | Co-60            | NorHuFib                     | +          | Simone, Soule 2009      |
| let-7d    | 0.2, 2Gy                 | 0.5, 48, 168h | gamma            | human 3D tissue system       | -          | Dickey, Zemp 2011       |
| let-7d    | 1, 10Gy                  | 4, 24h        | Cs-137           | Normal thyroid cells         | +          | Nikiforova, Gandhi 2011 |
| let-7d    | 2.5Gy                    | 2, 8, 24h     | gamma            | CRL2741                      | -          | Weidhaas, Babar 2007    |
| let-7d    | 2.5Gy                    | 2, 8h         | gamma            | A549                         | -          | Weidhaas, Babar 2007    |
| let-7d    | 2.5Gy                    | 6h            | 90 kV x-ray      | Male mouse spleen            | +          | Ilnytsky, Zemp 2008     |
| let-7d    | 2 Gy                     | 4h            | proton           | Mouse testis                 | +          | Khan, Tariq 2013        |
| let-7d-5p | 10 Gy                    | 5, 15, 40h    | gamma            | PC3                          | -          | Leung, Li 2014          |
| let-7e    | 0.25, 0.5, 1, 3, 5, 10Gy | 1h            | Co-60            | NorHuFib                     | +          | Simone, Soule 2009      |
| let-7e    | 0.2, 2Gy                 | 0.5, 48, 168h | gamma            | human 3D tissue system       | -          | Dickey, Zemp 2011       |

|           |                          |               |                              |                             |     |                             |
|-----------|--------------------------|---------------|------------------------------|-----------------------------|-----|-----------------------------|
| let-7e    | 2.5Gy                    | 2, 8, 24h     | gamma                        | CRL2741                     | -   | Weidhaas, Babar 2007        |
| let-7e    | 2.5Gy                    | 2, 8, 24h     | gamma                        | A549                        | -   | Weidhaas, Babar 2007        |
| let-7e    | 10Gy                     | 24h           | Cs-137                       | B lymphoblasts IM9          | -   | Cha, Shin 2009              |
| let-7e    | 0.2Gy                    | 4h            | Cs-137                       | human PBL                   | -   | Girardi, De Pitta 2012      |
| let-7e-5p | 10 Gy                    | 5, 15, 40h    | gamma                        | PC3                         | -   | Leung, Li 2014              |
| let-7-5p  | 0.34Gy                   | 24h           | <sup>177</sup> Lu-octreotate | mouse renal cortical tissue | +   | present study               |
| let-7f    | 0.2, 2Gy                 | 0.5, 48, 168h | gamma                        | human 3D tissue system      | -   | Dickey, Zemp 2011           |
| let-7f    | 1, 10Gy                  | 4, 24h        | Cs-137                       | Normal thyroid cells        | -   | Nikiforova, Gandhi 2011     |
| let-7f    | 2Gy                      | 1h            | gamma                        | CD34+                       | +   | Li, Ha 2012                 |
| let-7f    | 2.5Gy                    | 2, 8, 24h     | gamma                        | CRL2741                     | -   | Weidhaas, Babar 2007        |
| let-7f    | 2.5Gy                    | 2, 8, 24h     | gamma                        | A549                        | -   | Weidhaas, Babar 2007        |
| let-7f    | 1.25Gy                   | 4h            | gamma                        | human blood (TBI)           | +   | Templin, Paul 2011          |
| let-7f    | 1Gy                      | 24h           | Cs-137                       | B lymphoblasts IM9          | -   | Cha, Shin 2009              |
| let-7f    | 1Gy                      | 96h           | 90 kV x-ray                  | Female mouse frontal lobe   | +   | Koturbash, Zemp             |
| let-7f-2  | 0.05Gy                   | 8h            | Cs-137                       | B lymphoblasts IM9          | -   | Cha, Seong 2009             |
| let-7g    | 0.25, 0.5, 1, 3, 5, 10Gy | 1h            | Co-60                        | NorHuFib                    | +   | Simone, Soule 2009          |
| let-7g    | 0.2, 2Gy                 | 0.5, 168h     | gamma                        | human 3D tissue system      | -   | Dickey, Zemp 2011           |
| let-7g    | 2 Gy                     | 6h            | 6MV gamma                    | endoth cells                | +   | Wagner-Ecker, Schwager 2010 |
| let-7g    | 1, 10Gy                  | 4, 24h        | Cs-137                       | Normal thyroid cells        | +/- | Nikiforova, Gandhi 2011     |
| let-7g    | 8Gy                      | 1h            | gamma                        | hFOB                        | +   | Li, Ha 2012                 |
| let-7g    | 2.5Gy                    | 24h           | gamma                        | A549                        | +   | Weidhaas, Babar 2007        |
| let-7g    | 1.25Gy                   | 4h            | gamma                        | human blood (TBI)           | +   | Templin, Paul 2011          |
| let-7g    | 18.8Gy                   | 4h            | 6 MV photon                  | U87MG glioblastoma          | +   | Chen, Zhu 2009              |
| let-7g    | 2.5Gy                    | 6h            | 90 kV x-ray                  | Male mouse spleen           | -   | Illynskyy, Zemp 2008        |
| let-7i    | 0.25, 0.5, 1, 3, 5, 10Gy | 1h            | Co-60                        | NorHuFib                    | +   | Simone, Soule 2009          |
| let-7i    | 0.2, 2Gy                 | 0.5, 48h      | gamma                        | human 3D tissue system      | +/- | Dickey, Zemp 2011           |
| let-7i    | 2.5Gy                    | 2, 8, 24h     | gamma                        | A549                        | -   | Weidhaas, Babar 2007        |
| let-7k    | 13Gy                     | 24h           | <sup>177</sup> Lu-octreotate | mouse renal cortical tissue | -   | present study               |
| miR-1     | 1.0 Gy                   | 6 h           | proton                       | mouse blood                 | -   | Templin, Young 2012         |
| miR-1     | 1Gy                      | 4, 24h        | Cs-137                       | Normal thyroid cells        | -   | Nikiforova, Gandhi 2011     |
| miR-1     | 10Gy                     | 4, 24h        | Cs-137                       | Normal thyroid cells        | -   | Nikiforova, Gandhi 2011     |
| miR-1     | 1Gy                      | 96h           | 90 kV x-ray                  | Female mouse hippocampus    | -   | Koturbash, Zemp             |
| miR-7     | 2.5Gy                    | 24h           | gamma                        | CRL2741                     | -   | Weidhaas, Babar 2007        |

|            |                         |               |                              |                             |     |                             |
|------------|-------------------------|---------------|------------------------------|-----------------------------|-----|-----------------------------|
| miR-7      | 2.5Gy                   | 2h            | gamma                        | A549                        | +   | Weidhaas, Babar 2007        |
| miR-7      | 8Gy                     | 6h            | gamma                        | HeLa                        | +   | Hu, Tie 2013                |
| miR-7      | 2.5Gy                   | 6h            | 90 kV x-ray                  | Male mouse spleen           | -   | Ilnytskyy, Zemp 2008        |
| miR-9-1    | 6Gy                     | 24h           | 15 MeV photons               | prostate cancer cells LNCaP | +   | Li, Shi 2011                |
| miR-9-3p   | 2.5Gy                   | 8, 24 h       | gamma                        | CRL2741                     | +/- | Weidhaas, Babar 2007        |
| miR-9-3p   | 18.8Gy                  | 4h            | 6 MV photon                  | U87MG glioblastoma          | +   | Chen, Zhu 2009              |
| miR-9-5p   | 10 Gy                   | 5, 15, 40h    | gamma                        | PC3                         | +   | Leung, Li 2014              |
| miR-10a    | 5Gy                     | 6h            | Cs-137                       | Mouse blood                 | +   | Templin, Amundson 2011      |
| miR-10a    | 2Gy                     | 24h           | Cs-137                       | human PBL                   | -   | Girardi, De Pitta 2012      |
| miR-10a-5p | 0.34Gy                  | 24h           | <sup>177</sup> Lu-octreotate | mouse renal cortical tissue | +   | present study               |
| miR-10b    | 0.5, 1Gy                | 6 h           | p                            | mouse blood                 | -   | Templin, Young 2012         |
| miR-10b    | 2 Gy                    | 4h            | proton                       | Mouse liver                 | -   | Khan, Tariq 2013            |
| miR-15a    | 2.5Gy                   | 2, 8, 24h     | gamma                        | CRL2741                     | -   | Weidhaas, Babar 2007        |
| miR-15a    | 2.5Gy                   | 2, 8, 24h     | gamma                        | A549                        | -   | Weidhaas, Babar 2007        |
| miR-15a    | 8Gy                     | 6h            | gamma                        | HeLa                        | -   | Hu, Tie 2013                |
| miR-15a    | 1Gy                     | 6h            | 90 kV x-ray                  | Female mouse cerebellum     | +   | Koturbash, Zemp             |
| miR-15a-5p | 1.3, 1.3, 13Gy          | 24h           | <sup>177</sup> Lu-octreotate | mouse renal cortical tissue | +   | present study               |
| miR-15a-5p | 10 Gy                   | 5, 15, 40h    | gamma                        | PC3                         | -   | Leung, Li 2014              |
| miR-15b    | 0.250.5, 1, 3, 5, 10 Gy | 1h            | Co-60                        | NorHuFib                    | +   | Simone, Soule 2009          |
| miR-15b    | 0.2Gy                   | 0.5h          | gamma                        | human 3D tissue system      | -   | Dickey, Zemp 2011           |
| miR-15b    | 2Gy                     | 0.5, 168h     | gamma                        | human 3D tissue system      | -   | Dickey, Zemp 2011           |
| miR-15b    | 8Gy                     | 1h            | gamma                        | hFOB                        | +   | Li, Ha 2012                 |
| miR-15b    | 2.5Gy                   | 8, 24h        | gamma                        | CRL2741                     | -   | Weidhaas, Babar 2007        |
| miR-15b    | 2.5Gy                   | 2, 8, 24h     | gamma                        | A549                        | -   | Weidhaas, Babar 2007        |
| miR-15b    | 8Gy                     | 6h            | gamma                        | HeLa                        | -   | Hu, Tie 2013                |
| miR-15b    | 1Gy                     | 24h           | Cs-137                       | B lymphoblasts IM9          | -   | Cha, Shin 2009              |
| miR-15b-5p | 1.3Gy                   | 24h           | <sup>177</sup> Lu-octreotate | mouse renal cortical tissue | +   | present study               |
| miR-16     | 0.2Gy                   | 0.5, 48h      | gamma                        | human 3D tissue system      | +   | Dickey, Zemp 2011           |
| miR-16     | 2Gy                     | 0.5, 48, 168h | gamma                        | human 3D tissue system      | +/- | Dickey, Zemp 2011           |
| miR-16     | 2 Gy                    | 6h            | 6MV gamma                    | endoth cells                | +   | Wagner-Ecker, Schwager 2010 |
| miR-16     | 20, 40Gy                | 24h           | Cs-137                       | lung carcinoma cell A549    | -   | Shin, Cha 2009              |
| miR-16     | 2.5Gy                   | 2, 8, 24h     | gamma                        | CRL2741                     | -   | Weidhaas, Babar 2007        |
| miR-16     | 2.5Gy                   | 2, 24h        | gamma                        | A549                        | -   | Weidhaas, Babar 2007        |

|             |        |            |                              |                              |   |                             |
|-------------|--------|------------|------------------------------|------------------------------|---|-----------------------------|
| miR-16      | 1.25Gy | 4h         | gamma                        | human blood (TBI)            | + | Templin, Paul 2011          |
| miR-16      | 1Gy    | 24h        | Cs-137                       | B lymphoblasts IM9           | - | Cha, Shin 2009              |
| miR-16      | 8Gy    | 6h         | gamma                        | HeLa                         | + | Hu, Tie 2013                |
| miR-16      | 0.2Gy  | 4h         | Cs-137                       | human PBL                    | + | Girardi, De Pitta 2012      |
| miR-16-1    | 0.05Gy | 8h         | Cs-137                       | B lymphoblasts IM9           | - | Cha, Seong 2009             |
| miR-16-2-3p | 2Gy    | 24h        | Cs-137                       | human PBL                    | - | Girardi, De Pitta 2012      |
| miR-17      | 0.2Gy  | 168h       | gamma                        | human 3D tissue system       | - | Dickey, Zemp 2011           |
| miR-17      | 2Gy    | 168h       | gamma                        | human 3D tissue system       | - | Dickey, Zemp 2011           |
| miR-17      | 1.25Gy | 4h         | gamma                        | human blood (TBI)            | + | Templin, Paul 2011          |
| miR-17      | 2Gy    | 24h        | Cs-137                       | human PBL                    | - | Girardi, De Pitta 2012      |
| miR-17-3p   | 1Gy    | 6h         | 90 kV x-ray                  | Male mouse cerebellum        | + | Koturbash, Zemp             |
| miR-17-3p   | 10 Gy  | 5, 15, 40h | gamma                        | PC3                          | - | Leung, Li 2014              |
| miR-17-5p   | 6Gy    | 3h         | Cs-137                       | proliferating keratinocytes  | - | Joly-Tonetti, Vinuelas      |
| miR-17-5p   | 2.5Gy  | 2, 8, 24h  | gamma                        | CRL2741                      | - | Weidhaas, Babar 2007        |
| miR-17-5p   | 2.5Gy  | 2, 8h      | gamma                        | A549                         | - | Weidhaas, Babar 2007        |
| miR-17-5p   | 0.05Gy | 8h         | Cs-137                       | B lymphoblasts IM9           | - | Cha, Seong 2009             |
| miR-17-5p   | 1Gy    | 24h        | Cs-137                       | B lymphoblasts IM9           | - | Cha, Shin 2009              |
| miR-17-5p   | 8Gy    | 6h         | gamma                        | HeLa                         | + | Hu, Tie 2013                |
| miR-17-5p   | 0.34Gy | 24h        | <sup>177</sup> Lu-octreotate | mouse renal cortical tissue  | + | present study               |
| miR-18      | 0.05Gy | 8h         | Cs-137                       | B lymphoblasts IM9           | - | Cha, Seong 2009             |
| miR-18a     | 2 Gy   | 6h         | 6MV gamma                    | endoth cells                 | - | Wagner-Ecker, Schwager 2010 |
| miR-18a     | 2 Gy   | 6h         | 250 keV x-rays               | foreskin fibroblasts         | - | Maes, An 2008               |
| miR-18a     | 1Gy    | 24h        | Cs-137                       | B lymphoblasts IM9           | - | Cha, Shin 2009              |
| miR-18b     | 2.5Gy  | 8h         | gamma                        | CRL2741                      | + | Weidhaas, Babar 2007        |
| miR-18b     | 2Gy    | 24h        | Cs-137                       | human PBL                    | - | Girardi, De Pitta 2012      |
| miR-19a     | 2.5Gy  | 2, 8, 24h  | gamma                        | CRL2741                      | - | Weidhaas, Babar 2007        |
| miR-19a     | 2.5Gy  | 2h         | gamma                        | A549                         | - | Weidhaas, Babar 2007        |
| miR-19a     | 1.25Gy | 4h         | gamma                        | human blood (TBI)            | + | Templin, Paul 2011          |
| miR-19a     | 8Gy    | 6h         | gamma                        | HeLa                         | + | Hu, Tie 2013                |
| miR-19a     | 0.05Gy | 8h         | Cs-137                       | B lymphoblasts IM9           | - | Cha, Seong 2009             |
| miR-19a-3p  | 6Gy    | 3h         | Cs-137                       | differentiated keratinocytes | + | Joly-Tonetti, Vinuelas      |
| miR-19b     | 8Gy    | 1h         | gamma                        | hFOB                         | - | Li, Ha 2012                 |
| miR-19b     | 2.5Gy  | 2, 8, 24h  | gamma                        | CRL2741                      | - | Weidhaas, Babar 2007        |

|            |                           |               |                              |                             |    |                             |
|------------|---------------------------|---------------|------------------------------|-----------------------------|----|-----------------------------|
| miR-19b    | 2.5Gy                     | 2, 8, 24h     | gamma                        | A549                        | -  | Weidhaas, Babar 2007        |
| miR-19b    | 1Gy                       | 24h           | Cs-137                       | B lymphoblasts IM9          | -  | Cha, Shin 2009              |
| miR-19b    | 8Gy                       | 6h            | gamma                        | HeLa                        | -  | Hu, Tie 2013                |
| miR-19b    | 2Gy                       | 24h           | Cs-137                       | human PBL                   | -  | Girardi, De Pitta 2012      |
| miR-20     | 0.05Gy                    | 8h            | Cs-137                       | B lymphoblasts IM9          | -  | Cha, Seong 2009             |
| miR-20a    | 0.2, 2Gy                  | 0.5, 48, 168h | gamma                        | human 3D tissue system      | +- | Dickey, Zemp 2011           |
| miR-20a    | 2 Gy                      | 6h            | 6MV gamma                    | endoth cells                | +  | Wagner-Ecker, Schwager 2010 |
| miR-20a    | 2.5Gy                     | 8h            | gamma                        | CRL2741                     | +  | Weidhaas, Babar 2007        |
| miR-20a    | 1.25Gy                    | 4h            | gamma                        | human blood (TBI)           | +  | Templin, Paul 2011          |
| miR-20a    | 1Gy                       | 24h           | Cs-137                       | B lymphoblasts IM9          | -  | Cha, Shin 2009              |
| miR-20a    | 2.5Gy                     | 6h            | 90 kV x-ray                  | Male mouse spleen           | -  | Illynskyy, Zemp 2008        |
| miR-20b    | 2.5Gy                     | 2, 8, 24h     | gamma                        | CRL2741                     | -  | Weidhaas, Babar 2007        |
| miR-20b    | 2.5Gy                     | 2, 8, 24h     | gamma                        | A549                        | -  | Weidhaas, Babar 2007        |
| miR-20b    | 1.25Gy                    | 4h            | gamma                        | human blood (TBI)           | +  | Templin, Paul 2011          |
| miR-20b    | 8Gy                       | 6h            | gamma                        | HeLa                        | +  | Hu, Tie 2013                |
| miR-20b    | 1Gy                       | 96h           | 90 kV x-ray                  | Female mouse hippocampus    | +  | Koturbash, Zemp             |
| miR-20b-5p | 0.34, 4.3 Gy              | 24h           | <sup>177</sup> Lu-octreotate | mouse renal cortical tissue | +  | present study               |
| miR-21     | 0.25, 0.5, 1, 3, 5, 10 Gy | 1h            | Co-60                        | NorHuFib                    | +  | Simone, Soule 2009          |
| miR-21     | 2Gy                       | 168h          | gamma                        | human 3D tissue system      | +  | Dickey, Zemp 2011           |
| miR-21     | 2 Gy                      | 6h            | 6MV gamma                    | endoth cells                | +  | Wagner-Ecker, Schwager 2010 |
| miR-21     | 2.5Gy                     | 2, 8, 24h     | gamma                        | A549                        | +- | Weidhaas, Babar 2007        |
| miR-21     | 1.25Gy                    | 4h            | gamma                        | human blood (TBI)           | +  | Templin, Paul 2011          |
| miR-21     | 0.05Gy                    | 8h            | Cs-137                       | B lymphoblasts IM9          | -  | Cha, Seong 2009             |
| miR-21     | 8Gy                       | 6h            | gamma                        | HeLa                        | +  | Hu, Tie 2013                |
| miR-21     | 1Gy                       | 24h           | Cs-137                       | B lymphoblasts IM9          | -  | Cha, Shin 2009              |
| miR-21-3p  | 0.2, 2Gy                  | 4h            | Cs-137                       | human PBL                   | -  | Girardi, De Pitta 2012      |
| miR-21a-5p | 13Gy                      | 24h           | <sup>177</sup> Lu-octreotate | mouse renal cortical tissue | +  | present study               |
| miR-22     | 0.2, 2Gy                  | 0.5, 168h     | gamma                        | human 3D tissue system      | +- | Dickey, Zemp 2011           |
| miR-22     | 40Gy                      | 24h           | Cs-137                       | lung carcinoma cell A549    | +  | Shin, Cha 2009              |
| miR-22     | 6Gy                       | 24h           | 15 MeV photons               | prostate cancer cells LNCaP | +  | Li, Shi 2011                |
| miR-22     | 2.5Gy                     | 8, 24h        | gamma                        | CRL2741                     | +  | Weidhaas, Babar 2007        |
| miR-22     | 2.5Gy                     | 2, 8, 24h     | gamma                        | A549                        | +  | Weidhaas, Babar 2007        |
| miR-22     | 18.8Gy                    | 4h            | 6 MV photon                  | U87MG glioblastoma          | +  | Chen, Zhu 2009              |

|            |                          |               |                              |                             |     |                        |
|------------|--------------------------|---------------|------------------------------|-----------------------------|-----|------------------------|
| miR-22-3p  | 4.3, 13Gy                | 24h           | <sup>177</sup> Lu-octreotate | mouse renal cortical tissue | +   | present study          |
| miR-22-3p  | 10 Gy                    | 5, 15, 40h    | gamma                        | PC3                         | +   | Leung, Li 2014         |
| miR-22-5p  | 1Gy                      | 6h            | 90 kV x-ray                  | Female mouse frontal lobe   | -   | Koturbash, Zemp        |
| miR-23a    | 0.2Gy                    | 48, 168h      | gamma                        | human 3D tissue system      | -   | Dickey, Zemp 2011      |
| miR-23a    | 2Gy                      | 48, 168h      | gamma                        | human 3D tissue system      | -   | Dickey, Zemp 2011      |
| miR-23a    | 2.5Gy                    | 2, 8, 24h     | gamma                        | CRL2741                     | -   | Weidhaas, Babar 2007   |
| miR-23a    | 2.5Gy                    | 8h            | gamma                        | A549                        | -   | Weidhaas, Babar 2007   |
| miR-23a    | 8Gy                      | 6h            | gamma                        | HeLa                        | +   | Hu, Tie 2013           |
| miR-23a    | 0.05Gy                   | 8h            | Cs-137                       | B lymphoblasts IM9          | -   | Cha, Seong 2009        |
| miR-23a-5p | 0.2Gy                    | 4h            | Cs-137                       | human PBL                   | +   | Girardi, De Pitta 2012 |
| miR-23b    | 0.2Gy                    | 48, 168h      | gamma                        | human 3D tissue system      | -   | Dickey, Zemp 2011      |
| miR-23b    | 2Gy                      | 48, 168h      | gamma                        | human 3D tissue system      | -   | Dickey, Zemp 2011      |
| miR-23b    | 2Gy                      | 1h            | gamma                        | CD34+                       | +   | Li, Ha 2012            |
| miR-23b    | 2.5Gy                    | 2, 8, 24h     | gamma                        | CRL2741                     | -   | Weidhaas, Babar 2007   |
| miR-23b    | 0.05Gy                   | 8h            | Cs-137                       | B lymphoblasts IM9          | -   | Cha, Seong 2009        |
| miR-24     | 0.25, 0.5, 1, 3, 5, 10Gy | 1h            | Co-60                        | NorHuFib                    | -   | Simone, Soule 2009     |
| miR-24     | 0.2Gy                    | 0.5, 168h     | gamma                        | human 3D tissue system      | +/- | Dickey, Zemp 2011      |
| miR-24     | 2Gy                      | 0.5, 48, 168h | gamma                        | human 3D tissue system      | +   | Dickey, Zemp 2011      |
| miR-24     | 6Gy                      | 24h           | 15 MeV photons               | prostate cancer cells LNCaP | +   | Li, Shi 2011           |
| miR-24     | 2.5Gy                    | 2, 24h        | gamma                        | CRL2741                     | -   | Weidhaas, Babar 2007   |
| miR-24     | 2.5Gy                    | 2, 8, 24h     | gamma                        | A549                        | -   | Weidhaas, Babar 2007   |
| miR-24     | 1.25Gy                   | 4h            | gamma                        | human blood (TBI)           | +   | Templin, Paul 2011     |
| miR-24     | 8Gy                      | 6h            | gamma                        | HeLa                        | +   | Hu, Tie 2013           |
| miR-24     | 1Gy                      | 24h           | Cs-137                       | B lymphoblasts IM9          | -   | Cha, Shin 2009         |
| miR-25     | 0.2Gy                    | 0.5h          | gamma                        | human 3D tissue system      | -   | Dickey, Zemp 2011      |
| miR-25     | 2Gy                      | 0.5, 48h      | gamma                        | human 3D tissue system      | +/- | Dickey, Zemp 2011      |
| miR-25     | 2.5Gy                    | 2h            | gamma                        | CRL2741                     | -   | Weidhaas, Babar 2007   |
| miR-25     | 8Gy                      | 6h            | gamma                        | HeLa                        | +   | Hu, Tie 2013           |
| miR-25     | 2.5Gy                    | 2h            | gamma                        | A549                        | -   | Weidhaas, Babar 2007   |
| miR-25-3p  | 10 Gy                    | 5, 15, 40h    | gamma                        | PC3                         | +   | Leung, Li 2014         |
| miR-26a    | 0.2Gy                    | 0.5, 48h      | gamma                        | human 3D tissue system      | -   | Dickey, Zemp 2011      |
| miR-26a    | 2.5Gy                    | 2h            | gamma                        | A549                        | -   | Weidhaas, Babar 2007   |
| miR-26a-5p | 6Gy                      | 3h            | Cs-137                       | proliferating keratinocytes | -   | Joly-Tonetti, Vinuelas |

|            |                          |               |                              |                              |     |                        |
|------------|--------------------------|---------------|------------------------------|------------------------------|-----|------------------------|
| miR-26b    | 0.25, 0.5, 1, 3, 5, 10Gy | 1h            | Co-60                        | NorHuFib                     | +   | Simone, Soule 2009     |
| miR-26b    | 0.2, 2Gy                 | 0.5, 48, 168h | gamma                        | human 3D tissue system       | +/- | Dickey, Zemp 2011      |
| miR-26b    | 2.5Gy                    | 24h           | gamma                        | CRL2741                      | -   | Weidhaas, Babar 2007   |
| miR-26b    | 8Gy                      | 6h            | gamma                        | HeLa                         | -   | Hu, Tie 2013           |
| miR-26b    | 1.25Gy                   | 4h            | gamma                        | human blood (TBI)            | +   | Templin, Paul 2011     |
| miR-26b-5p | 4.3Gy                    | 24h           | <sup>177</sup> Lu-octreotate | mouse renal cortical tissue  | +   | present study          |
| miR-27a    | 0.2Gy                    | 0.5, 48, 168h | gamma                        | human 3D tissue system       | +/- | Dickey, Zemp 2011      |
| miR-27a    | 2Gy                      | 0.5, 48, 168h | gamma                        | human 3D tissue system       | +/- | Dickey, Zemp 2011      |
| miR-27a    | 2.5Gy                    | 2, 8, 24h     | gamma                        | CRL2741                      | -   | Weidhaas, Babar 2007   |
| miR-27a    | 2.5Gy                    | 2, 8, 24h     | gamma                        | A549                         | -   | Weidhaas, Babar 2007   |
| miR-27a    | 8Gy                      | 6h            | gamma                        | HeLa                         | +   | Hu, Tie 2013           |
| miR-27a    | 1.25Gy                   | 4h            | gamma                        | human blood (TBI)            | +   | Templin, Paul 2011     |
| miR-27a    | 1Gy                      | 96h           | 90 kV x-ray                  | Male mouse frontal lobe      | -   | Koturbash, Zemp        |
| miR-27b    | 0.2Gy                    | 168h          | gamma                        | human 3D tissue system       | -   | Dickey, Zemp 2011      |
| miR-27b    | 2Gy                      | 0.5, 48, 168h | gamma                        | human 3D tissue system       | +/- | Dickey, Zemp 2011      |
| miR-27b    | 8Gy                      | 1h            | gamma                        | hFOB                         | +   | Li, Ha 2012            |
| miR-27b    | 2.5Gy                    | 2, 8, 24h     | gamma                        | CRL2741                      | -   | Weidhaas, Babar 2007   |
| miR-27b    | 2.5Gy                    | 8, 24h        | gamma                        | A549                         | -   | Weidhaas, Babar 2007   |
| miR-27b    | 8Gy                      | 6h            | gamma                        | HeLa                         | -   | Hu, Tie 2013           |
| miR-27b    | 1Gy                      | 96h           | 90 kV x-ray                  | Male mouse frontal lobe      | -   | Koturbash, Zemp        |
| miR-28     | 2.5Gy                    | 2, 24h        | gamma                        | A549                         | +   | Weidhaas, Babar 2007   |
| miR-28-3p  | 6Gy                      | 3h            | Cs-137                       | differentiated keratinocytes | +   | Joly-Tonetti, Vinuelas |
| miR-29a    | 0.2Gy                    | 0.5, 168h     | gamma                        | human 3D tissue system       | +/- | Dickey, Zemp 2011      |
| miR-29a    | 2Gy                      | 0.5, 168h     | gamma                        | human 3D tissue system       | +/- | Dickey, Zemp 2011      |
| miR-29a    | 2.5Gy                    | 2, 8, 24h     | gamma                        | CRL2741                      | -   | Weidhaas, Babar 2007   |
| miR-29a    | 2.5Gy                    | 2, 8, 24h     | gamma                        | A549                         | -   | Weidhaas, Babar 2007   |
| miR-29a    | 1.25Gy                   | 4h            | gamma                        | human blood (TBI)            | +   | Templin, Paul 2011     |
| miR-29a    | 1Gy                      | 24h           | Cs-137                       | B lymphoblasts IM9           | -   | Cha, Shin 2009         |
| miR-29a    | 8Gy                      | 6h            | gamma                        | HeLa                         | +   | Hu, Tie 2013           |
| miR-29a    | 1Gy                      | 6, 96h        | 90 kV x-ray                  | Female mouse frontal lobe    | -   | Koturbash, Zemp        |
| miR-29b    | 6Gy                      | 24h           | 15 MeV photons               | prostate cancer cells LNCaP  | +   | Li, Shi 2011           |
| miR-29b    | 2.5Gy                    | 2, 8, 24h     | gamma                        | CRL2741                      | -   | Weidhaas, Babar 2007   |
| miR-29b    | 2.5Gy                    | 2, 8, 24h     | gamma                        | A549                         | -   | Weidhaas, Babar 2007   |

|              |           |               |                              |                             |     |                             |
|--------------|-----------|---------------|------------------------------|-----------------------------|-----|-----------------------------|
| miR-29b      | 2.5Gy     | 6h            | 90 kV x-ray                  | Female mouse spleen         | -   | Ilnytsky, Zemp 2008         |
| miR-29b-1    | 8Gy       | 1h            | gamma                        | hFOB                        | +   | Li, Ha 2012                 |
| miR-29b-1-5p | 2Gy       | 24h           | Cs-137                       | human PBL                   | -   | Girardi, De Pitta 2012      |
| miR-29c      | 0.2Gy     | 48h           | gamma                        | human 3D tissue system      | +   | Dickey, Zemp 2011           |
| miR-29c      | 2Gy       | 0.5, 168h     | gamma                        | human 3D tissue system      | +/- | Dickey, Zemp 2011           |
| miR-29c      | 2 Gy      | 6h            | 6MV gamma                    | endoth cells                | +   | Wagner-Ecker, Schwager 2010 |
| miR-29c      | 8Gy       | 1h            | gamma                        | hFOB                        | +   | Li, Ha 2012                 |
| miR-29c      | 2.5Gy     | 24h           | gamma                        | CRL2741                     | +   | Weidhaas, Babar 2007        |
| miR-29c      | 2.5Gy     | 2, 8h         | gamma                        | A549                        | +   | Weidhaas, Babar 2007        |
| miR-29c      | 1.25Gy    | 4h            | gamma                        | human blood (TBI)           | +   | Templin, Paul 2011          |
| miR-29c      | 8Gy       | 6h            | gamma                        | HeLa                        | +   | Hu, Tie 2013                |
| miR-29c      | 10Gy      | 24h           | Cs-137                       | B lymphoblasts IM9          | +   | Cha, Shin 2009              |
| miR-29c-5p   | 1Gy       | 6, 96h        | 90 kV x-ray                  | Female mouse frontal lobe   | -   | Koturbash, Zemp             |
| miR-29c-5p   | 1Gy       | 96h           | 90 kV x-ray                  | Male mouse frontal lobe     | -   | Koturbash, Zemp             |
| miR-30a      | 0.2, 2Gy  | 0.5, 48, 168h | gamma                        | human 3D tissue system      | +/- | Dickey, Zemp 2011           |
| miR-30a-5p   | 6Gy       | 24h           | 15 MeV photons               | prostate cancer cells LNCaP | +   | Li, Shi 2011                |
| miR-30a-5p   | 2.5Gy     | 2, 8, 24h     | gamma                        | CRL2741                     | -   | Weidhaas, Babar 2007        |
| miR-30a-5p   | 2.5Gy     | 2, 8, 24h     | gamma                        | A549                        | -   | Weidhaas, Babar 2007        |
| miR-30a-5p   | 10 Gy     | 5, 15, 40h    | gamma                        | PC3                         | +   | Leung, Li 2014              |
| miR-30b      | 0.2, 2Gy  | 0.5, 168h     | gamma                        | human 3D tissue system      | +/- | Dickey, Zemp 2011           |
| miR-30b      | 40Gy      | 24h           | Cs-137                       | lung carcinoma cell A549    | -   | Shin, Cha 2009              |
| miR-30b      | 2Gy       | 1h            | gamma                        | CD34+                       | +   | Li, Ha 2012                 |
| miR-30b      | 2.5Gy     | 2, 8, 24h     | gamma                        | CRL2741                     | -   | Weidhaas, Babar 2007        |
| miR-30b      | 2.5Gy     | 2, 8, 24h     | gamma                        | A549                        | -   | Weidhaas, Babar 2007        |
| miR-30b-5p   | 13Gy      | 24h           | <sup>177</sup> Lu-octreotate | mouse renal cortical tissue | +   | present study               |
| miR-30c      | 0.2Gy     | 0.5, 48, 168h | gamma                        | human 3D tissue system      | +   | Dickey, Zemp 2011           |
| miR-30c      | 40Gy      | 24h           | Cs-137                       | lung carcinoma cell A549    | +   | Shin, Cha 2009              |
| miR-30c      | 2Gy       | 1h            | gamma                        | CD34+                       | +   | Li, Ha 2012                 |
| miR-30c      | 8Gy       | 1h            | gamma                        | hFOB                        | -   | Li, Ha 2012                 |
| miR-30c      | 2.5Gy     | 2, 8, 24h     | gamma                        | CRL2741                     | -   | Weidhaas, Babar 2007        |
| miR-30c      | 2.5Gy     | 2, 8, 24h     | gamma                        | A549                        | -   | Weidhaas, Babar 2007        |
| miR-30c-5p   | 4.3, 13Gy | 24h           | <sup>177</sup> Lu-octreotate | mouse renal cortical tissue | +   | present study               |
| miR-30d      | 0.2, 2Gy  | 48, 168h      | gamma                        | human 3D tissue system      | +   | Dickey, Zemp 2011           |



|            |           |               |                              |                             |     |                         |
|------------|-----------|---------------|------------------------------|-----------------------------|-----|-------------------------|
| miR-30d    | 2Gy       | 1h            | gamma                        | CD34+                       | +   | Li, Ha 2012             |
| miR-30d    | 2.5Gy     | 2, 24h        | gamma                        | A549                        | +   | Weidhaas,               |
| miR-30d    | 2Gy       | 24h           | Cs-137                       | human PBL                   | -   | Girardi, De Pitta 2012  |
| miR-30d-3p | 10 Gy     | 5, 15, 40h    | gamma                        | PC3                         | -   | Leung, Li 2014          |
| miR-30e    | 8Gy       | 1h            | gamma                        | hFOB                        | +   | Li, Ha 2012             |
| miR-30e-3p | 2.5Gy     | 2h            | gamma                        | A549                        | +   | Weidhaas, Babar 2007    |
| miR-30e-3p | 2Gy       | 24h           | Cs-137                       | human PBL                   | -   | Girardi, De Pitta 2012  |
| miR-30e-5p | 2.5Gy     | 24h           | gamma                        | CRL2741                     | +   | Weidhaas, Babar 2007    |
| miR-30e-5p | 2.5Gy     | 2h            | gamma                        | A549                        | +   | Weidhaas, Babar 2007    |
| miR-30e-5p | 1.3, 13Gy | 24h           | <sup>177</sup> Lu-octreotate | mouse renal cortical tissue | +   | present study           |
| miR-31     | 0.2Gy     | 0.5, 48, 168h | gamma                        | human 3D tissue system      | +/- | Dickey, Zemp 2011       |
| miR-31     | 2Gy       | 0.5, 48h      | gamma                        | human 3D tissue system      | +   | Dickey, Zemp 2011       |
| miR-31     | 2.5Gy     | 2, 8, 24h     | gamma                        | CRL2741                     | -   | Weidhaas, Babar 2007    |
| miR-31     | 8Gy       | 6h            | gamma                        | HeLa                        | -   | Hu, Tie 2013            |
| miR-31     | 2.5Gy     | 2, 8, 24h     | gamma                        | A549                        | -   | Weidhaas, Babar 2007    |
| miR-31-5p  | 6Gy       | 3h            | Cs-137                       | proliferating keratinocytes | -   | Joly-Tonetti, Vinuelas  |
| miR-34a    | 40Gy      | 24h           | Cs-137                       | lung carcinoma cell A549    | +   | Shin, Cha 2009          |
| miR-34a    | 1Gy       | 24h           | Cs-137                       | Normal thyroid cells        | -   | Nikiforova, Gandhi 2011 |
| miR-34a    | 10Gy      | 4h            | Cs-137                       | Normal thyroid cells        | +   | Nikiforova, Gandhi 2011 |
| miR-34a    | 2.5Gy     | 8, 24h        | gamma                        | A549                        | +   | Weidhaas, Babar 2007    |
| miR-34a    | 10Gy      | 24h           | Cs-137                       | B lymphoblasts IM9          | +   | Cha, Shin 2009          |
| miR-34a    | 2.5Gy     | 6h            | 90 kV x-ray                  | Male mouse spleen           | +   | Ilnytskyy, Zemp 2008    |
| miR-34a    | 2.5Gy     | 6h            | 90 kV x-ray                  | Female mouse spleen         | +   | Ilnytskyy, Zemp 2008    |
| miR-34a    | 0.2Gy     | 4h            | Cs-137                       | human PBL                   | -   | Girardi, De Pitta 2012  |
| miR-34a    | 0.2, 2Gy  | 24h           | Cs-137                       | human PBL                   | +   | Girardi, De Pitta 2012  |
| miR-34a    | 1Gy       | 6h            | 90 kV x-ray                  | Female mouse frontal lobe   | -   | Koturbash, Zemp         |
| miR-34b    | 40Gy      | 24h           | Cs-137                       | lung carcinoma cell A549    | +   | Shin, Cha 2009          |
| miR-34b    | 1Gy       | 24h           | Cs-137                       | Normal thyroid cells        | +   | Nikiforova, Gandhi 2011 |
| miR-34b    | 10Gy      | 4, 24h        | Cs-137                       | Normal thyroid cells        | +   | Nikiforova, Gandhi 2011 |
| miR-34b    | 10Gy      | 24h           | Cs-137                       | B lymphoblasts IM9          | +   | Cha, Shin 2009          |
| miR-34b-5p | 0.2, 2Gy  | 4h            | Cs-137                       | human PBL                   | -   | Girardi, De Pitta 2012  |
| miR-34b-5p | 0.2, 2Gy  | 24h           | Cs-137                       | human PBL                   | +   | Girardi, De Pitta 2012  |
| miR-34c    | 1.0 Gy    | 6 h           | p                            | mouse blood                 | -   | Templin, Young 2012     |

|            |                      |               |                              |                             |    |                         |
|------------|----------------------|---------------|------------------------------|-----------------------------|----|-------------------------|
| miR-34c    | 6Gy                  | 4h            | 6 MV photons                 | LNCaP prostate cancer cell  | +  | Josson, Sung 2008       |
| miR-34c    | 6Gy                  | 4h            | 6 MV photons                 | C4-2 prostate cancer cell   | +  | Josson, Sung 2008       |
| miR-34c    | 1Gy                  | 96h           | 90 kV x-ray                  | Female mouse hippocampus    | +  | Koturbash, Zemp         |
| miR-34c    | 1Gy                  | 6h            | 90 kV x-ray                  | Male mouse hippocampus      | -  | Koturbash, Zemp         |
| miR-34c-3p | 0.2Gy                | 0.5, 48, 168h | gamma                        | human 3D tissue system      | +- | Dickey, Zemp 2011       |
| miR-34c-3p | 2Gy                  | 0.5, 48, 168h | gamma                        | human 3D tissue system      | +- | Dickey, Zemp 2011       |
| miR-34c-5p | 0.2Gy                | 0.5h          | gamma                        | human 3D tissue system      | +  | Dickey, Zemp 2011       |
| miR-92     | 2.5Gy                | 8h            | gamma                        | CRL2741                     | -  | Weidhaas, Babar 2007    |
| miR-92     | 8Gy                  | 6h            | gamma                        | HeLa                        | +  | Hu, Tie 2013            |
| miR-92     | 1Gy                  | 96h           | 90 kV x-ray                  | Female mouse frontal lobe   | +  | Koturbash, Zemp         |
| miR-92a    | 2Gy                  | 1h            | gamma                        | CD34+                       | +  | Li, Ha 2012             |
| miR-92a-3p | 0.34, 1.3, 4.3, 13Gy | 24h           | <sup>177</sup> Lu-octreotate | mouse renal cortical tissue | +  | present study           |
| miR-92a-5p | 10 Gy                | 5, 15, 40h    | gamma                        | PC3                         | -  | Leung, Li 2014          |
| miR-92b    | 2 Gy                 | 0.5h          | 250 keV x-rays               | foreskin fibroblasts        | -  | Maes, An 2008           |
| miR-92b    | 2Gy                  | 1h            | gamma                        | CD34+                       | +  | Li, Ha 2012             |
| miR-92b    | 2.5Gy                | 8h            | gamma                        | CRL2741                     | -  | Weidhaas, Babar 2007    |
| miR-93     | 1Gy                  | 4, 24h        | Cs-137                       | Normal thyroid cells        | -  | Nikiforova, Gandhi 2011 |
| miR-93     | 10Gy                 | 4, 24h        | Cs-137                       | Normal thyroid cells        | -  | Nikiforova, Gandhi 2011 |
| miR-93     | 1.25Gy               | 4h            | gamma                        | human blood (TBI)           | +  | Templin, Paul 2011      |
| miR-93     | 1Gy                  | 24h           | Cs-137                       | B lymphoblasts IM9          | -  | Cha, Shin 2009          |
| miR-93     | 2.5Gy                | 6h            | 90 kV x-ray                  | Male mouse spleen           | -  | Ilnytskyy, Zemp 2008    |
| miR-93     | 1Gy                  | 96h           | 90 kV x-ray                  | Male mouse frontal lobe     | -  | Koturbash, Zemp         |
| miR-95     | 2Gy                  | 24h           | Cs-137                       | human PBL                   | -  | Girardi, De Pitta 2012  |
| miR-96     | 1Gy                  | 4h            | Cs-137                       | Normal thyroid cells        | +  | Nikiforova, Gandhi 2011 |
| miR-96     | 10Gy                 | 4h            | Cs-137                       | Normal thyroid cells        | +  | Nikiforova, Gandhi 2011 |
| miR-96     | 1Gy                  | 6h            | 90 kV x-ray                  | Female mouse frontal lobe   | +  | Koturbash, Zemp         |
| miR-98     | 2.5Gy                | 24h           | gamma                        | CRL2741                     | -  | Weidhaas, Babar 2007    |
| miR-98     | 8Gy                  | 6h            | gamma                        | HeLa                        | -  | Hu, Tie 2013            |
| miR-98     | 2.5Gy                | 2h            | gamma                        | A549                        | +  | Weidhaas, Babar 2007    |
| miR-99a    | 1.0 Gy               | 6 h           | p                            | mouse blood                 | -  | Templin, Young 2012     |
| miR-99a    | 2.5Gy                | 8h            | gamma                        | CRL2741                     | +  | Weidhaas, Babar 2007    |
| miR-99a    | 2.5Gy                | 2, 8, 24h     | gamma                        | A549                        | +  | Weidhaas, Babar 2007    |
| miR-99a    | 8Gy                  | 6h            | gamma                        | HeLa                        | +  | Hu, Tie 2013            |

|            |                          |           |                              |                             |   |                        |
|------------|--------------------------|-----------|------------------------------|-----------------------------|---|------------------------|
| miR-99a    | 2Gy                      | 24h       | Cs-137                       | human PBL                   | - | Girardi, De Pitta 2012 |
| miR-99b    | 8Gy                      | 6h        | gamma                        | HeLa                        | + | Hu, Tie 2013           |
| miR-99b    | 10Gy                     | 8h        | Cs-137                       | B lymphoblasts IM9          | + | Cha, Seong 2009        |
| miR-99b    | 2 Gy                     | 4h        | proton                       | Mouse brain                 | + | Khan, Tariq 2013       |
| miR-99b    | 2 Gy                     | 4h        | proton                       | Mouse testis                | + | Khan, Tariq 2013       |
| miR-99b-5p | 6Gy                      | 3h        | Cs-137                       | proliferating keratinocytes | - | Joly-Tonetti, Vinuelas |
| miR-99b-5p | 0.34Gy                   | 24h       | <sup>177</sup> Lu-octreotate | mouse renal cortical tissue | + | present study          |
| miR-100    | 0.25, 0.5, 1, 3, 5, 10Gy | 1h        | Co-60                        | NorHuFib                    | - | Simone, Soule 2009     |
| miR-100    | 1.0 Gy                   | 6 h       | p                            | mouse blood                 | - | Templin, Young 2012    |
| miR-100    | 6Gy                      | 4h        | 6 MV photons                 | LNcaP prostate cancer cell  | - | Josson, Sung 2008      |
| miR-100    | 8Gy                      | 1h        | gamma                        | hFOB                        | - | Li, Ha 2012            |
| miR-100    | 2.5Gy                    | 8h        | gamma                        | CRL2741                     | + | Weidhaas, Babar 2007   |
| miR-100    | 2.5Gy                    | 24h       | gamma                        | A549                        | + | Weidhaas, Babar 2007   |
| miR-100    | 8Gy                      | 6h        | gamma                        | HeLa                        | + | Hu, Tie 2013           |
| miR-100    | 2Gy                      | 24h       | Cs-137                       | human PBL                   | - | Girardi, De Pitta 2012 |
| miR-100    | 2 Gy                     | 4h        | proton                       | Mouse brain                 | + | Khan, Tariq 2013       |
| miR-101    | 2.5Gy                    | 8, 24h    | gamma                        | CRL2741                     | + | Weidhaas, Babar 2007   |
| miR-101    | 2.5Gy                    | 2, 24h    | gamma                        | A549                        | + | Weidhaas, Babar 2007   |
| miR-101    | 8Gy                      | 6h        | gamma                        | HeLa                        | + | Hu, Tie 2013           |
| miR-101    | 1.25Gy                   | 4h        | gamma                        | human blood (TBI)           | + | Templin, Paul 2011     |
| miR-101-5p | 2Gy                      | 24h       | Cs-137                       | human PBL                   | - | Girardi, De Pitta 2012 |
| miR-101a   | 2.5Gy                    | 6h        | 90 kV x-ray                  | Male mouse thymus           | + | Ilnytsky, Zemp 2008    |
| miR-101b   | 2.5Gy                    | 6h        | 90 kV x-ray                  | Male mouse spleen           | - | Ilnytsky, Zemp 2008    |
| miR-101b   | 1Gy                      | 6, 96h    | 90 kV x-ray                  | Female mouse frontal lobe   | - | Koturbash, Zemp        |
| miR-101b   | 1Gy                      | 96h       | 90 kV x-ray                  | Male mouse frontal lobe     | - | Koturbash, Zemp        |
| miR-103    | 0.2, 2Gy                 | 0.5, 168h | gamma                        | human 3D tissue system      | + | Dickey, Zemp 2011      |
| miR-103    | 2Gy                      | 1h        | gamma                        | CD34+                       | - | Li, Ha 2012            |
| miR-103    | 1.25Gy                   | 4h        | gamma                        | human blood (TBI)           | + | Templin, Paul 2011     |
| miR-103    | 1Gy                      | 24h       | Cs-137                       | B lymphoblasts IM9          | - | Cha, Shin 2009         |
| miR-106a   | 20, 40                   | 24h       | Cs-137                       | lung carcinoma cell A549    | - | Shin, Cha 2009         |
| miR-106a   | 2.5Gy                    | 2, 8, 24h | gamma                        | CRL2741                     | - | Weidhaas, Babar 2007   |
| miR-106a   | 2.5Gy                    | 2, 8h     | gamma                        | A549                        | - | Weidhaas, Babar 2007   |
| miR-106a   | 1.25Gy                   | 4h        | gamma                        | human blood (TBI)           | + | Templin, Paul 2011     |

|             |                          |               |                              |                             |    |                             |
|-------------|--------------------------|---------------|------------------------------|-----------------------------|----|-----------------------------|
| miR-106a    | 0.05Gy                   | 8h            | Cs-137                       | B lymphoblasts IM9          | -  | Cha, Seong 2009             |
| miR-106a    | 1Gy                      | 24h           | Cs-137                       | B lymphoblasts IM9          | -  | Cha, Shin 2009              |
| miR-106a    | 8Gy                      | 6h            | gamma                        | HeLa                        | -  | Hu, Tie 2013                |
| miR-106a-5p | 0.34, 1.3, 13Gy          | 24h           | <sup>177</sup> Lu-octreotate | mouse renal cortical tissue | +  | present study               |
| miR-106b    | 6Gy                      | 24h           | 15 MeV photons               | prostate cancer cells LNCaP | -  | Li, Shi 2011                |
| miR-106b    | 2.5Gy                    | 8h            | gamma                        | CRL2741                     | +  | Weidhaas, Babar 2007        |
| miR-106b    | 2.5Gy                    | 24h           | gamma                        | A549                        | +  | Weidhaas, Babar 2007        |
| miR-106b    | 1.25Gy                   | 4h            | gamma                        | human blood (TBI)           | +  | Templin, Paul 2011          |
| miR-106b    | 0.05, 1Gy                | 8, 24h        | Cs-137                       | B lymphoblasts IM9          | -  | Cha, Seong 2009             |
| miR-106b    | 1Gy                      | 96h           | 90 kV x-ray                  | Male mouse cerebellum       | +  | Koturbash, Zemp             |
| miR-106b    | 1Gy                      | 96h           | 90 kV x-ray                  | Male mouse frontal lobe     | -  | Koturbash, Zemp             |
| miR-106b-5p | 4.3, 13Gy                | 24h           | <sup>177</sup> Lu-octreotate | mouse renal cortical tissue | +  | present study               |
| miR-107     | 0.2, 2Gy                 | 0.5, 48, 168h | gamma                        | human 3D tissue system      | +- | Dickey, Zemp 2011           |
| miR-107     | 6Gy                      | 4h            | 6 MV photons                 | LNCaP prostate cancer cell  | -  | Josson, Sung 2008           |
| miR-107     | 1Gy                      | 24h           | Cs-137                       | B lymphoblasts IM9          | -  | Cha, Shin 2009              |
| miR-107     | 18.8Gy                   | 4h            | 6 MV photon                  | U87MG glioblastoma          | -  | Chen, Zhu 2009              |
| miR-107-3p  | 0.34, 1.3, 4.3, 13Gy     | 24h           | <sup>177</sup> Lu-octreotate | mouse renal cortical tissue | +  | present study               |
| miR-122a    | 6Gy                      | 4h            | 6 MV photons                 | LNCaP prostate cancer cell  | -  | Josson, Sung 2008           |
| miR-122a    | 1Gy                      | 4, 24h        | Cs-137                       | Normal thyroid cells        | +  | Nikiforova, Gandhi 2011     |
| miR-122a    | 10Gy                     | 4, 24h        | Cs-137                       | Normal thyroid cells        | +  | Nikiforova, Gandhi 2011     |
| miR-123a    | 1Gy                      | 6h            | 90 kV x-ray                  | Male mouse hippocampus      | +  | Koturbash, Zemp             |
| miR-125a    | 2 Gy                     | 6h            | 6MV gamma                    | endoth cells                | -  | Wagner-Ecker, Schwager 2010 |
| miR-125a    | 2.5Gy                    | 8, 24h        | gamma                        | CRL2741                     | -  | Weidhaas, Babar 2007        |
| miR-125a    | 2.5Gy                    | 2, 8, 24h     | gamma                        | A549                        | -  | Weidhaas, Babar 2007        |
| miR-125a    | 1Gy                      | 6h            | 90 kV x-ray                  | Female mouse hippocampus    | -  | Koturbash, Zemp             |
| miR-125a-3p | 5Gy                      | 24h           | Cs-137                       | Mouse blood                 | +  | Templin, Amundson 2011      |
| miR-125a-3p | 0.1Gy                    | 6h            | Fe-56                        | Mouse blood                 | -  | Templin, Amundson 2011      |
| miR-125a-3p | 10 Gy                    | 5, 15, 40h    | gamma                        | PC3                         | -  | Leung, Li 2014              |
| miR-125a-5p | 0.2Gy                    | 0.5, 48h      | gamma                        | human 3D tissue system      | +- | Dickey, Zemp 2011           |
| miR-125a-5p | 2Gy                      | 0.5h          | gamma                        | human 3D tissue system      | -  | Dickey, Zemp 2011           |
| miR-125a-5p | 0.34, 1.3Gy              | 24h           | <sup>177</sup> Lu-octreotate | mouse renal cortical tissue | +  | present study               |
| miR-125b    | 0.25, 0.5, 1, 3, 5, 10Gy | 1h            | Co-60                        | NorHuFib                    | -  | Simone, Soule 2009          |

|             |          |          |                              |                              |   |                             |
|-------------|----------|----------|------------------------------|------------------------------|---|-----------------------------|
| miR-125b    | 0.2Gy    | 48, 168h | gamma                        | human 3D tissue system       | + | Dickey, Zemp 2011           |
| miR-125b    | 8Gy      | 1h       | gamma                        | hFOB                         | - | Li, Ha 2012                 |
| miR-125b    | 2.5Gy    | 2h       | gamma                        | CRL2741                      | - | Weidhaas, Babar 2007        |
| miR-125b    | 2.5Gy    | 24h      | gamma                        | A549                         | - | Weidhaas, Babar 2007        |
| miR-125b-5p | 1.0 Gy   | 6 h      | p                            | mouse blood                  | - | Templin, Young 2012         |
| miR-125b-5p | 6Gy      | 3h       | Cs-137                       | differentiated keratinocytes | - | Joly-Tonetti, Vinuelas      |
| miR-125b-5p | 0.34Gy   | 24h      | <sup>177</sup> Lu-octreotate | mouse renal cortical tissue  | + | present study               |
| miR-126     | 2.5Gy    | 2, 24h   | gamma                        | A549                         | + | Weidhaas, Babar 2007        |
| miR-126     | 1.25Gy   | 4h       | gamma                        | human blood (TBI)            | + | Templin, Paul 2011          |
| miR-126-5p  | 2Gy      | 4h       | Cs-137                       | human PBL                    | - | Girardi, De Pitta 2012      |
| miR-127     | 1.0 Gy   | 6 h      | p                            | mouse blood                  | - | Templin, Young 2012         |
| miR-127     | 2 Gy     | 6h       | 6MV gamma                    | endoth cells                 | - | Wagner-Ecker, Schwager 2010 |
| miR-127     | 2 Gy     | 4h       | proton                       | Mouse liver                  | + | Khan, Tariq 2013            |
| miR-127-3p  | 20, 40Gy | 24h      | Cs-137                       | lung carcinoma cell A549     | + | Shin, Cha 2009              |
| miR-127-3p  | 8Gy      | 1h       | gamma                        | hFOB                         | - | Li, Ha 2012                 |
| miR-129-5p  | 1Gy      | 6h       | 90 kV x-ray                  | Female mouse cerebellum      | + | Koturbash, Zemp             |
| miR-130a    | 2.5Gy    | 8h       | gamma                        | CRL2741                      | + | Weidhaas, Babar 2007        |
| miR-130a    | 1.25Gy   | 4h       | gamma                        | human blood (TBI)            | + | Templin, Paul 2011          |
| miR-130a    | 1Gy      | 6h       | 90 kV x-ray                  | Female mouse cerebellum      | + | Koturbash, Zemp             |
| miR-130b    | 2Gy      | 1h       | gamma                        | CD34+                        | - | Li, Ha 2012                 |
| miR-130b    | 1Gy      | 96h      | 90 kV x-ray                  | Male mouse hippocampus       | - | Koturbash, Zemp             |
| miR-132     | 2.5Gy    | 24h      | gamma                        | CRL2741                      | + | Weidhaas, Babar 2007        |
| miR-133a    | 1Gy      | 96h      | 90 kV x-ray                  | Female mouse hippocampus     | - | Koturbash, Zemp             |
| miR-133b    | 6Gy      | 4h       | 6 MV photons                 | LNCaP prostate cancer cell   | - | Josson, Sung 2008           |
| miR-133b    | 6Gy      | 4h       | 6 MV photons                 | C4-2 prostate cancer cell    | - | Josson, Sung 2008           |
| miR-134     | 1, 10Gy  | 24h      | Cs-137                       | B lymphoblasts IM9           | + | Cha, Shin 2009              |
| miR-135a    | 1.5, 5Gy | 6h       | Cs-137                       | Mouse blood                  | + | Templin, Amundson 2011      |
| miR-135a    | 1Gy      | 96h      | 90 kV x-ray                  | Female mouse hippocampus     | + | Koturbash, Zemp             |
| miR-135a-3p | 0.2, 2Gy | 24h      | Cs-137                       | human PBL                    | + | Girardi, De Pitta 2012      |
| miR-135b    | 6Gy      | 4h       | 6 MV photons                 | C4-2 prostate cancer cell    | - | Josson, Sung 2008           |
| miR-135b    | 5Gy      | 6h       | Cs-137                       | Mouse blood                  | + | Templin, Amundson 2011      |
| miR-137     | 0.1 Gy   | 24h      | 250 keV x-rays               | foreskin fibroblasts         | - | Maes, An 2008               |
| miR-138     | 2.5Gy    | 2h       | gamma                        | A549                         | + | Weidhaas, Babar 2007        |

|            |          |           |                              |                             |     |                         |
|------------|----------|-----------|------------------------------|-----------------------------|-----|-------------------------|
| miR-138    | 2 Gy     | 4h        | proton                       | Mouse testis                | -   | Khan, Tariq 2013        |
| miR-139-3p | 20 Gy    | 24h       | Cs-137                       | lung carcinoma cell A549    | -   | Shin, Cha 2009          |
| miR-139-5p | 5Gy      | 6h        | Cs-137                       | Mouse blood                 | +   | Templin, Amundson 2011  |
| miR-140-3p | 1Gy      | 6h        | 90 kV x-ray                  | Female mouse frontal lobe   | -   | Koturbash, Zemp         |
| miR-140-3p | 0.34Gy   | 24h       | <sup>177</sup> Lu-octreotate | mouse renal cortical tissue | +   | present study           |
| miR-140-5p | 1.25Gy   | 4h        | gamma                        | human blood (TBI)           | +   | Templin, Paul 2011      |
| miR-141    | 0.2Gy    | 0.5, 48h  | gamma                        | human 3D tissue system      | +   | Dickey, Zemp 2011       |
| miR-141    | 2Gy      | 0.5, 48h  | gamma                        | human 3D tissue system      | +   | Dickey, Zemp 2011       |
| miR-141    | 6Gy      | 24h       | 15 MeV photons               | prostate cancer cells LNCaP | +   | Li, Shi 2011            |
| miR-141    | 2.5Gy    | 24h       | gamma                        | CRL2741                     | +   | Weidhaas, Babar 2007    |
| miR-141    | 2Gy      | 24h       | Cs-137                       | human PBL                   | -   | Girardi, De Pitta 2012  |
| miR-141    | 1Gy      | 6h        | 90 kV x-ray                  | Female mouse frontal lobe   | +   | Koturbash, Zemp         |
| miR-142-3p | 1.25Gy   | 4h        | gamma                        | human blood (TBI)           | +   | Templin, Paul 2011      |
| miR-142-3p | 1Gy      | 24h       | Cs-137                       | B lymphoblasts IM9          | -   | Cha, Shin 2009          |
| miR-142-5p | 1.25Gy   | 4h        | gamma                        | human blood (TBI)           | +   | Templin, Paul 2011      |
| miR-142-5p | 1Gy      | 24h       | Cs-137                       | B lymphoblasts IM9          | -   | Cha, Shin 2009          |
| miR-143    | 1.0 Gy   | 6 h       | p                            | mouse blood                 | -   | Templin, Young 2012     |
| miR-143    | 6Gy      | 4h        | 6 MV photons                 | C4-2 prostate cancer cell   | -   | Josson, Sung 2008       |
| miR-143    | 1.25Gy   | 4h        | gamma                        | human blood (TBI)           | +   | Templin, Paul 2011      |
| miR-143    | 1Gy      | 6h        | 90 kV x-ray                  | Female mouse frontal lobe   | -   | Koturbash, Zemp         |
| miR-145    | 6Gy      | 4h        | 6 MV photons                 | LNCaP prostate cancer cell  | -   | Josson, Sung 2008       |
| miR-145    | 1.25Gy   | 4h        | gamma                        | human blood (TBI)           | +   | Templin, Paul 2011      |
| miR-145    | 0.2Gy    | 4h        | Cs-137                       | human PBL                   | +   | Girardi, De Pitta 2012  |
| miR-146    | 1Gy      | 6h        | 90 kV x-ray                  | Female mouse frontal lobe   | -   | Koturbash, Zemp         |
| miR-146a   | 1Gy      | 4, 24h    | Cs-137                       | Normal thyroid cells        | +/- | Nikiforova, Gandhi 2011 |
| miR-146a   | 10Gy     | 24h       | Cs-137                       | Normal thyroid cells        | -   | Nikiforova, Gandhi 2011 |
| miR-146a   | 5Gy      | 24h       | Cs-137                       | Mouse blood                 | -   | Templin, Amundson 2011  |
| miR-146a   | 1Gy      | 24h       | Cs-137                       | B lymphoblasts IM9          | -   | Cha, Shin 2009          |
| miR-146a   | 2Gy      | 4h        | Cs-137                       | human PBL                   | -   | Girardi, De Pitta 2012  |
| miR-146b   | 2 Gy     | 4h        | proton                       | Mouse testis                | +   | Khan, Tariq 2013        |
| miR-147    | 1.5, 5Gy | 6h        | Cs-137                       | Mouse blood                 | +   | Templin, Amundson 2011  |
| miR-148a   | 2.5Gy    | 2, 8, 24h | gamma                        | CRL2741                     | -   | Weidhaas, Babar 2007    |
| miR-148a   | 1.25Gy   | 4h        | gamma                        | human blood (TBI)           | +   | Templin, Paul 2011      |

|            |             |               |                              |                             |    |                             |
|------------|-------------|---------------|------------------------------|-----------------------------|----|-----------------------------|
| miR-148b   | 2 Gy        | 6h            | 6MV gamma                    | endoth cells                | -  | Wagner-Ecker, Schwager 2010 |
| miR-148b   | 2.5Gy       | 24h           | gamma                        | CRL2741                     | +  | Weidhaas, Babar 2007        |
| miR-148b   | 2.5Gy       | 2, 24h        | gamma                        | A549                        | +  | Weidhaas, Babar 2007        |
| miR-148b   | 1.25Gy      | 4h            | gamma                        | human blood (TBI)           | +  | Templin, Paul 2011          |
| miR-148b   | 8Gy         | 6h            | gamma                        | HeLa                        | +  | Hu, Tie 2013                |
| miR-148b   | 1Gy         | 6h            | 90 kV x-ray                  | Female mouse cerebellum     | +  | Koturbash, Zemp             |
| miR-149    | 0.2Gy       | 48, 168h      | gamma                        | human 3D tissue system      | +- | Dickey, Zemp 2011           |
| miR-149    | 2Gy         | 0.5, 48, 168h | gamma                        | human 3D tissue system      | +- | Dickey, Zemp 2011           |
| miR-149    | 2Gy         | 1h            | gamma                        | CD34+                       | -  | Li, Ha 2012                 |
| miR-149    | 1Gy         | 96h           | 90 kV x-ray                  | Male mouse frontal lobe     | -  | Koturbash, Zemp             |
| miR-150    | 1.5Gy       | 6h            | Cs-137                       | Mouse blood                 | -  | Templin, Amundson 2011      |
| miR-150    | 5Gy         | 24h           | Cs-137                       | Mouse blood                 | -  | Templin, Amundson 2011      |
| miR-150    | 0.5Gy       | 24h           | Fe-56                        | Mouse blood                 | -  | Templin, Amundson 2011      |
| miR-150    | 2 Gy        | 4h            | proton                       | Mouse liver                 | +  | Khan, Tariq 2013            |
| miR-150-3p | 0.2Gy       | 24h           | Cs-137                       | human PBL                   | +  | Girardi, De Pitta 2012      |
| miR-151    | 1Gy         | 96h           | 90 kV x-ray                  | Female mouse hippocampus    | -  | Koturbash, Zemp             |
| miR-151-3p | 8Gy         | 1h            | gamma                        | hFOB                        | -  | Li, Ha 2012                 |
| miR-151-3p | 5Gy         | 24h           | Cs-137                       | Mouse blood                 | +  | Templin, Amundson 2011      |
| miR-151-3p | 2Gy         | 24h           | Cs-137                       | human PBL                   | -  | Girardi, De Pitta 2012      |
| miR-151-5p | 0.2, 2Gy    | 48, 168h      | gamma                        | human 3D tissue system      | +  | Dickey, Zemp 2011           |
| miR-151-5p | 0.34, 1.3Gy | 24h           | <sup>177</sup> Lu-octreotate | mouse renal cortical tissue | +  | present study               |
| miR-152    | 2.5Gy       | 2h            | gamma                        | A549                        | -  | Weidhaas, Babar 2007        |
| miR-152    | 0.2, 2Gy    | 24h           | Cs-137                       | human PBL                   | -  | Girardi, De Pitta 2012      |
| miR-153    | 1Gy         | 96h           | 90 kV x-ray                  | Female mouse frontal lobe   | -  | Koturbash, Zemp             |
| miR-154    | 6Gy         | 4h            | 6 MV photons                 | C4-2 prostate cancer cell   | +  | Josson, Sung 2008           |
| miR-154    | 1Gy         | 96h           | 90 kV x-ray                  | Female mouse hippocampus    | -  | Koturbash, Zemp             |
| miR-154    | 1Gy         | 6h            | 90 kV x-ray                  | Female mouse frontal lobe   | -  | Koturbash, Zemp             |
| miR-155    | 2.5Gy       | 2, 8, 24h     | gamma                        | CRL2741                     | -  | Weidhaas, Babar 2007        |
| miR-155    | 0.05Gy      | 8h            | Cs-137                       | B lymphoblasts IM9          | -  | Cha, Seong 2009             |
| miR-155    | 1Gy         | 24h           | Cs-137                       | B lymphoblasts IM9          | -  | Cha, Shin 2009              |
| miR-155    | 8Gy         | 6h            | gamma                        | HeLa                        | -  | Hu, Tie 2013                |
| miR-155    | 1Gy         | 96h           | 90 kV x-ray                  | Female mouse hippocampus    | +  | Koturbash, Zemp             |
| miR-181a   | 0.2, 2Gy    | 0.5, 168h     | gamma                        | human 3D tissue system      | +- | Dickey, Zemp 2011           |

|               |            |           |                              |                              |    |                         |
|---------------|------------|-----------|------------------------------|------------------------------|----|-------------------------|
| miR-181a      | 2.5Gy      | 2hh       | gamma                        | A549                         | +  | Weidhaas, Babar 2007    |
| miR-181a      | 18.8Gy     | 4h        | 6 MV photon                  | U87MG glioblastoma           | -  | Chen, Zhu 2009          |
| miR-181a      | 2Gy        | 24h       | Cs-137                       | human PBL                    | -  | Girardi, De Pitta 2012  |
| miR-181a-5p   | 6Gy        | 3h        | Cs-137                       | differentiated keratinocytes | +  | Joly-Tonetti, Vinuelas  |
| miR-181a-5p   | 0.34, 13Gy | 24h       | <sup>177</sup> Lu-octreotate | mouse renal cortical tissue  | +  | present study           |
| miR-181a-2-3p | 0.2, 2Gy   | 24h       | Cs-137                       | human PBL                    | -  | Girardi, De Pitta 2012  |
| miR-181b      | 2 Gy       | 6h        | 250 keV x-rays               | foreskin fibroblasts         | -  | Maes, An 2008           |
| miR-181b      | 2.5Gy      | 6h        | 90 kV x-ray                  | Female mouse spleen          | -  | Illynskyy, Zemp 2008    |
| miR-181b      | 0.2Gy      | 4h        | Cs-137                       | human PBL                    | +  | Girardi, De Pitta 2012  |
| miR-181b      | 8Gy        | 6h        | gamma                        | HeLa                         | +  | Hu, Tie 2013            |
| miR-181b      | 1Gy        | 6h        | 90 kV x-ray                  | Male mouse hippocampus       | -  | Koturbash, Zemp         |
| miR-181c      | 1, 10Gy    | 4, 24h    | Cs-137                       | Normal thyroid cells         | -  | Nikiforova, Gandhi 2011 |
| miR-181d      | 2.5Gy      | 2, 8h     | gamma                        | CRL2741                      | -  | Weidhaas, Babar 2007    |
| miR-181d      | 2.5Gy      | 2, 8, 24h | gamma                        | A549                         | -  | Weidhaas, Babar 2007    |
| miR-181d      | 8Gy        | 6h        | gamma                        | HeLa                         | -  | Hu, Tie 2013            |
| miR-181d      | 1Gy        | 96h       | 90 kV x-ray                  | Female mouse cerebellum      | +  | Koturbash, Zemp         |
| miR-182       | 0.2Gy      | 0.5h      | gamma                        | human 3D tissue system       | -  | Dickey, Zemp 2011       |
| miR-182       | 2Gy        | 0.5, 168h | gamma                        | human 3D tissue system       | +- | Dickey, Zemp 2011       |
| miR-182       | 2.5Gy      | 8, 24h    | gamma                        | CRL2741                      | -  | Weidhaas, Babar 2007    |
| miR-182       | 8Gy        | 6h        | gamma                        | HeLa                         | +  | Hu, Tie 2013            |
| miR-182       | 2.5Gy      | 2, 8, 24h | gamma                        | A549                         | -  | Weidhaas, Babar 2007    |
| miR-182-3p    | 2.5Gy      | 8, 24h    | gamma                        | CRL2741                      | -  | Weidhaas, Babar 2007    |
| miR-183       | 40Gy       | 24h       | Cs-137                       | lung carcinoma cell A549     | +  | Shin, Cha 2009          |
| miR-183       | 2.5Gy      | 24h       | gamma                        | CRL2741                      | -  | Weidhaas, Babar 2007    |
| miR-183       | 2.5Gy      | 2h        | gamma                        | A549                         | -  | Weidhaas, Babar 2007    |
| miR-184       | 2.5Gy      | 8h        | gamma                        | A549                         | -  | Weidhaas, Babar 2007    |
| miR-185       | 2.5Gy      | 2h        | gamma                        | A549                         | -  | Weidhaas, Babar 2007    |
| miR-185       | 1.25Gy     | 4h        | gamma                        | human blood (TBI)            | +  | Templin, Paul 2011      |
| miR-186       | 1Gy        | 4, 24h    | Cs-137                       | Normal thyroid cells         | -  | Nikiforova, Gandhi 2011 |
| miR-186       | 10Gy       | 4, 24h    | Cs-137                       | Normal thyroid cells         | -  | Nikiforova, Gandhi 2011 |
| miR-186       | 8Gy        | 6h        | gamma                        | HeLa                         | -  | Hu, Tie 2013            |
| miR-186       | 1Gy        | 96h       | 90 kV x-ray                  | Female mouse hippocampus     | +  | Koturbash, Zemp         |
| miR-186-5p    | 6Gy        | 3h        | Cs-137                       | differentiated keratinocytes | +  | Joly-Tonetti, Vinuelas  |



|             |                      |          |                              |                              |     |                             |
|-------------|----------------------|----------|------------------------------|------------------------------|-----|-----------------------------|
| miR-187     | 6Gy                  | 4h       | 6 MV photons                 | LNCaP prostate cancer cell   | -   | Josson, Sung 2008           |
| miR-187     | 10Gy                 | 8h       | Cs-137                       | B lymphoblasts IM9           | +   | Cha, Seong 2009             |
| miR-187     | 1Gy                  | 6h       | 90 kV x-ray                  | Female mouse cerebellum      | +   | Koturbash, Zemp             |
| miR-188     | 1Gy                  | 4, 24h   | Cs-137                       | Normal thyroid cells         | +   | Nikiforova, Gandhi 2011     |
| miR-188     | 10Gy                 | 4, 24h   | Cs-137                       | Normal thyroid cells         | +   | Nikiforova, Gandhi 2011     |
| miR-188-5p  | 2 Gy                 | 6h       | 250 keV x-rays               | foreskin fibroblasts         | -   | Maes, An 2008               |
| miR-188-5p  | 2Gy                  | 4h       | Cs-137                       | human PBL                    | -   | Girardi, De Pitta 2012      |
| miR-188-5p  | 0.2, 2Gy             | 24h      | Cs-137                       | human PBL                    | +   | Girardi, De Pitta 2012      |
| miR-189     | 2 Gy                 | 6h       | 6MV gamma                    | endoth cells                 | -   | Wagner-Ecker, Schwager 2010 |
| miR-190     | 1.25Gy               | 4h       | gamma                        | human blood (TBI)            | +   | Templin, Paul 2011          |
| miR-191     | 2Gy                  | 48, 168h | gamma                        | human 3D tissue system       | +/- | Dickey, Zemp 2011           |
| miR-191     | 6Gy                  | 24h      | 15 MeV photons               | prostate cancer cells LNCaP  | +   | Li, Shi 2011                |
| miR-191     | 2.5Gy                | 2, 24h   | gamma                        | CRL2741                      | -   | Weidhaas, Babar 2007        |
| miR-191     | 2.5Gy                | 2, 24h   | gamma                        | A549                         | -   | Weidhaas, Babar 2007        |
| miR-191     | 18.8Gy               | 4h       | 6 MV photon                  | U87MG glioblastoma           | +   | Chen, Zhu 2009              |
| miR-191-3p  | 2.5Gy                | 2, 24h   | gamma                        | CRL2741                      | -   | Weidhaas, Babar 2007        |
| miR-191-5p  | 6Gy                  | 3h       | Cs-137                       | proliferating keratinocytes  | -   | Joly-Tonetti, Vinuelas      |
| miR-192     | 40Gy                 | 24h      | Cs-137                       | lung carcinoma cell A549     | +   | Shin, Cha 2009              |
| miR-192     | 2 Gy                 | 0.5h     | 250 keV x-rays               | foreskin fibroblasts         | -   | Maes, An 2008               |
| miR-192     | 2.5Gy                | 6h       | 90 kV x-ray                  | Male mouse spleen            | -   | Illynskyy, Zemp 2008        |
| miR-192     | 1Gy                  | 6h       | 90 kV x-ray                  | Female mouse frontal lobe    | -   | Koturbash, Zemp             |
| miR-193a    | 1Gy                  | 4, 24h   | Cs-137                       | Normal thyroid cells         | +   | Nikiforova, Gandhi 2011     |
| miR-193a    | 10Gy                 | 4, 24h   | Cs-137                       | Normal thyroid cells         | +   | Nikiforova, Gandhi 2011     |
| miR-193b    | 10Gy                 | 24h      | Cs-137                       | B lymphoblasts IM9           | +   | Cha, Shin 2009              |
| miR-194     | 2.5Gy                | 2, 24h   | gamma                        | A549                         | +   | Weidhaas, Babar 2007        |
| miR-194     | 1Gy                  | 6h       | 90 kV x-ray                  | Female mouse frontal lobe    | -   | Koturbash, Zemp             |
| miR-194-5p  | 0.34, 1.3, 4.3, 13Gy | 24h      | <sup>177</sup> Lu-octreotate | mouse renal cortical tissue  | +   | present study               |
| miR-195     | 2Gy                  | 1h       | gamma                        | CD34+                        | -   | Li, Ha 2012                 |
| miR-195     | 2.5Gy                | 2, 8h    | gamma                        | A549                         | +   | Weidhaas, Babar 2007        |
| miR-195     | 1.25Gy               | 4h       | gamma                        | human blood (TBI)            | +   | Templin, Paul 2011          |
| miR-195-5p  | 6Gy                  | 3h       | Cs-137                       | differentiated keratinocytes | +   | Joly-Tonetti, Vinuelas      |
| miR-195a-5p | 13Gy                 | 24h      | <sup>177</sup> Lu-octreotate | mouse renal cortical tissue  | +   | present study               |
| miR-196a    | 6Gy                  | 4h       | 6 MV photons                 | LNCaP prostate cancer cell   | -   | Josson, Sung 2008           |

|             |                 |            |                              |                              |    |                        |
|-------------|-----------------|------------|------------------------------|------------------------------|----|------------------------|
| miR-196a    | 6Gy             | 4h         | 6 MV photons                 | C4-2 prostate cancer cell    | -  | Josson, Sung 2008      |
| miR-196a    | 8Gy             | 6h         | gamma                        | HeLa                         | -  | Hu, Tie 2013           |
| miR-196a    | 2Gy             | 24h        | Cs-137                       | human PBL                    | -  | Girardi, De Pitta 2012 |
| miR-196b    | 0.2Gy           | 4h         | Cs-137                       | human PBL                    | +  | Girardi, De Pitta 2012 |
| miR-196b    | 2Gy             | 24h        | Cs-137                       | human PBL                    | -  | Girardi, De Pitta 2012 |
| miR-196b-5p | 6Gy             | 3h         | Cs-137                       | differentiated keratinocytes | +  | Joly-Tonetti, Vinuelas |
| miR-197     | 2Gy             | 1h         | gamma                        | CD34+                        | +  | Li, Ha 2012            |
| miR-197     | 8Gy             | 1h         | gamma                        | hFOB                         | -  | Li, Ha 2012            |
| miR-197     | 2.5Gy           | 8, 24h     | gamma                        | CRL2741                      | -  | Weidhaas, Babar 2007   |
| miR-197     | 2.5Gy           | 24h        | gamma                        | A549                         | -  | Weidhaas, Babar 2007   |
| miR-197     | 0.05, 10Gy      | 8h         | Cs-137                       | B lymphoblasts IM9           | +  | Cha, Seong 2009        |
| miR-197     | 10Gy            | 24h        | Cs-137                       | B lymphoblasts IM9           | -  | Cha, Shin 2009         |
| miR-197-3p  | 6Gy             | 3h         | Cs-137                       | differentiated keratinocytes | +  | Joly-Tonetti, Vinuelas |
| miR-197-3p  | 10 Gy           | 5, 15, 40h | gamma                        | PC3                          | -  | Leung, Li 2014         |
| miR-199a    | 6Gy             | 24h        | 15 MeV photons               | prostate cancer cells LNCaP  | -  | Li, Shi 2011           |
| miR-199a-2  | 0.05, 10Gy      | 8h         | Cs-137                       | B lymphoblasts IM9           | +  | Cha, Seong 2009        |
| miR-199a-3p | 1.25Gy          | 4h         | gamma                        | human blood (TBI)            | +  | Templin, Paul 2011     |
| miR-199a-3p | 0.34Gy          | 24h        | <sup>177</sup> Lu-octreotate | mouse renal cortical tissue  | +  | present study          |
| miR-199a-5p | 0.34, 4.3, 13Gy | 24h        | <sup>177</sup> Lu-octreotate | mouse renal cortical tissue  | +  | present study          |
| miR-199b-5p | 0.2, 2Gy        | 4h         | Cs-137                       | human PBL                    | +  | Girardi, De Pitta 2012 |
| miR-199b-5p | 0.34, 1.3, 13Gy | 24h        | <sup>177</sup> Lu-octreotate | mouse renal cortical tissue  | +  | present study          |
| miR-200a    | 0.2Gy           | 0.5, 168h  | gamma                        | human 3D tissue system       | +- | Dickey, Zemp 2011      |
| miR-200a    | 2Gy             | 0.5, 168h  | gamma                        | human 3D tissue system       | +- | Dickey, Zemp 2011      |
| miR-200a    | 1.0 Gy          | 6,24h      | p                            | mouse blood                  | -  | Templin, Young 2012    |
| miR-200a    | 2.5Gy           | 8, 24h     | gamma                        | CRL2741                      | +  | Weidhaas, Babar 2007   |
| miR-200a    | 1Gy             | 6h         | 90 kV x-ray                  | Female mouse frontal lobe    | +  | Koturbash, Zemp        |
| miR-200a-5p | 2.5Gy           | 8, 24h     | gamma                        | CRL2741                      | +  | Weidhaas, Babar 2007   |
| miR-200b    | 0.2Gy           | 0.5, 168h  | gamma                        | human 3D tissue system       | +- | Dickey, Zemp 2011      |
| miR-200b    | 1.5Gy           | 6h         | Cs-137                       | Mouse blood                  | -  | Templin, Amundson 2011 |
| miR-200b    | 2Gy             | 24h        | Cs-137                       | human PBL                    | -  | Girardi, De Pitta 2012 |
| miR-200b    | 1Gy             | 6h         | 90 kV x-ray                  | Female mouse frontal lobe    | +  | Koturbash, Zemp        |
| miR-200b-3p | 6Gy             | 3h         | Cs-137                       | proliferating keratinocytes  | -  | Joly-Tonetti, Vinuelas |
| miR-200c    | 0.2Gy           | 168h       | gamma                        | human 3D tissue system       | -  | Dickey, Zemp 2011      |

|             |            |               |                              |                              |     |                         |
|-------------|------------|---------------|------------------------------|------------------------------|-----|-------------------------|
| miR-200c    | 2Gy        | 168h          | gamma                        | human 3D tissue system       | +   | Dickey, Zemp 2011       |
| miR-200c    | 6Gy        | 24h           | 15 MeV photons               | prostate cancer cells LNCaP  | +   | Li, Shi 2011            |
| miR-200c    | 2.5Gy      | 2, 8, 24h     | gamma                        | CRL2741                      | -   | Weidhaas, Babar 2007    |
| miR-200c    | 2.5Gy      | 6h            | 90 kV x-ray                  | Female mouse thymus          | +   | Ilnytskyy, Zemp 2008    |
| miR-200c    | 1Gy        | 6h            | 90 kV x-ray                  | Female mouse frontal lobe    | +   | Koturbash, Zemp         |
| miR-200c-3p | 6Gy        | 3h            | Cs-137                       | differentiated keratinocytes | +   | Joly-Tonetti, Vinuelas  |
| miR-202     | 1, 10Gy    | 24h           | Cs-137                       | B lymphoblasts IM9           | -   | Cha, Shin 2009          |
| miR-202     | 0.2Gy      | 4h            | Cs-137                       | human PBL                    | +   | Girardi, De Pitta 2012  |
| miR-202     | 0.2Gy      | 24h           | Cs-137                       | human PBL                    | +   | Girardi, De Pitta 2012  |
| miR-203     | 0.2Gy      | 0.5, 168h     | gamma                        | human 3D tissue system       | -   | Dickey, Zemp 2011       |
| miR-203     | 2Gy        | 0.5h          | gamma                        | human 3D tissue system       | -   | Dickey, Zemp 2011       |
| miR-203     | 1.0 Gy     | 6 h           | p                            | mouse blood                  | -   | Templin, Young 2012     |
| miR-203     | 1Gy        | 4, 24h        | Cs-137                       | Normal thyroid cells         | +   | Nikiforova, Gandhi 2011 |
| miR-203     | 10Gy       | 4, 24h        | Cs-137                       | Normal thyroid cells         | +   | Nikiforova, Gandhi 2011 |
| miR-204     | 1.0 Gy     | 6 h           | proton                       | mouse blood                  | -   | Templin, Young 2012     |
| miR-204     | 8Gy        | 6h            | gamma                        | HeLa                         | -   | Hu, Tie 2013            |
| miR-204     | 1Gy        | 6h            | 90 kV x-ray                  | Female mouse cerebellum      | +   | Koturbash, Zemp         |
| miR-204-5p  | 4.3, 13Gy  | 24h           | <sup>177</sup> Lu-octreotate | mouse renal cortical tissue  | +   | present study           |
| miR-205     | 0.2Gy      | 0.5, 48, 168h | gamma                        | human 3D tissue system       | +/- | Dickey, Zemp 2011       |
| miR-205     | 2Gy        | 0.5, 48h      | gamma                        | human 3D tissue system       | +   | Dickey, Zemp 2011       |
| miR-205     | 2.5Gy      | 2, 24h        | gamma                        | CRL2741                      | -   | Weidhaas, Babar 2007    |
| miR-205     | 2 Gy       | 4h            | proton                       | Mouse brain                  | +   | Khan, Tariq 2013        |
| miR-205-3p  | 6Gy        | 3h            | Cs-137                       | differentiated keratinocytes | +   | Joly-Tonetti, Vinuelas  |
| miR-206     | 20, 40 Gy  | 24h           | Cs-137                       | lung carcinoma cell A549     | -   | Shin, Cha 2009          |
| miR-206     | 2.5Gy      | 24h           | gamma                        | A549                         | +   | Weidhaas, Babar 2007    |
| miR-206     | 18.8Gy     | 4h            | 6 MV photon                  | U87MG glioblastoma           | -   | Chen, Zhu 2009          |
| miR-206     | 2.5Gy      | 6h            | 90 kV x-ray                  | Female mouse spleen          | +   | Ilnytskyy, Zemp 2008    |
| miR-206     | 1Gy        | 6h            | 90 kV x-ray                  | Male mouse hippocampus       | +   | Koturbash, Zemp         |
| miR-207     | 0.05, 10Gy | 8h            | Cs-137                       | B lymphoblasts IM9           | +   | Cha, Seong 2009         |
| miR-210     | 0.2, 2Gy   | 4h            | Cs-137                       | human PBL                    | +   | Girardi, De Pitta 2012  |
| miR-210     | 2Gy        | 24h           | Cs-137                       | human PBL                    | -   | Girardi, De Pitta 2012  |
| miR-211     | 5Gy        | 24h           | Cs-137                       | Mouse blood                  | -   | Templin, Amundson 2011  |
| miR-211     | 0.5Gy      | 24h           | Fe-56                        | Mouse blood                  | -   | Templin, Amundson 2011  |

|            |                          |               |                              |                             |     |                        |
|------------|--------------------------|---------------|------------------------------|-----------------------------|-----|------------------------|
| miR-211    | 1Gy                      | 96h           | 90 kV x-ray                  | Female mouse hippocampus    | +   | Koturbash, Zemp        |
| miR-214    | 2.5Gy                    | 2, 8, 24h     | gamma                        | A549                        | +/- | Weidhaas, Babar 2007   |
| miR-214    | 1Gy                      | 6h            | 90 kV x-ray                  | Male mouse hippocampus      | +   | Koturbash, Zemp        |
| miR-214-3p | 0.34, 4.3Gy              | 24h           | <sup>177</sup> Lu-octreotate | mouse renal cortical tissue | +   | present study          |
| miR-215    | 40Gy                     | 24h           | Cs-137                       | lung carcinoma cell A549    | +   | Shin, Cha 2009         |
| miR-216a   | 1Gy                      | 6, 96h        | 90 kV x-ray                  | Male mouse cerebellum       | +   | Koturbash, Zemp        |
| miR-216b   | 1Gy                      | 6, 96h        | 90 kV x-ray                  | Female mouse cerebellum     | +   | Koturbash, Zemp        |
| miR-216b   | 1Gy                      | 6, 96h        | 90 kV x-ray                  | Male mouse cerebellum       | +   | Koturbash, Zemp        |
| miR-217    | 1Gy                      | 6h            | 90 kV x-ray                  | Female mouse cerebellum     | +   | Koturbash, Zemp        |
| miR-217    | 1Gy                      | 6h            | 90 kV x-ray                  | Male mouse cerebellum       | +   | Koturbash, Zemp        |
| miR-218    | 1.0 Gy                   | 6 h           | p                            | mouse blood                 | -   | Templin, Young 2012    |
| miR-218    | 6Gy                      | 4h            | 6 MV photons                 | C4-2 prostate cancer cell   | -   | Josson, Sung 2008      |
| miR-219    | 1Gy                      | 96h           | 90 kV x-ray                  | Female mouse hippocampus    | +   | Koturbash, Zemp        |
| miR-220    | 0.05, 10Gy               | 8h            | Cs-137                       | B lymphoblasts IM9          | -   | Cha, Seong 2009        |
| miR-221    | 0.2, 2Gy                 | 0.5, 168h     | gamma                        | human 3D tissue system      | +/- | Dickey, Zemp 2011      |
| miR-221    | 2.5Gy                    | 2, 8, 24h     | gamma                        | CRL2741                     | -   | Weidhaas, Babar 2007   |
| miR-221    | 2.5Gy                    | 24h           | gamma                        | A549                        | -   | Weidhaas, Babar 2007   |
| miR-221    | 1.25Gy                   | 4h            | gamma                        | human blood (TBI)           | +   | Templin, Paul 2011     |
| miR-221    | 2.5Gy                    | 6h            | 90 kV x-ray                  | Male mouse spleen           | -   | Illytskyy, Zemp 2008   |
| miR-221    | 0.2Gy                    | 4h            | Cs-137                       | human PBL                   | +   | Girardi, De Pitta 2012 |
| miR-221-5p | 2Gy                      | 24h           | Cs-137                       | human PBL                   | -   | Girardi, De Pitta 2012 |
| miR-221-5p | 10 Gy                    | 5, 15, 40h    | gamma                        | PC3                         | -   | Leung, Li 2014         |
| miR-222    | 0.25, 0.5, 1, 3, 5, 10Gy | 1h            | Co-60                        | NorHuFib                    | -   | Simone, Soule 2009     |
| miR-222    | 0.2, 2Gy                 | 0.5, 48, 168h | gamma                        | human 3D tissue system      | +/- | Dickey, Zemp 2011      |
| miR-222    | 2.5Gy                    | 24h           | gamma                        | CRL2741                     | +   | Weidhaas, Babar 2007   |
| miR-222    | 2.5Gy                    | 24h           | gamma                        | A549                        | -   | Weidhaas, Babar 2007   |
| miR-222    | 1.25Gy                   | 4h            | gamma                        | human blood (TBI)           | +   | Templin, Paul 2011     |
| miR-222    | 8Gy                      | 6h            | gamma                        | HeLa                        | +   | Hu, Tie 2013           |
| miR-222    | 1Gy                      | 96h           | 90 kV x-ray                  | Female mouse cerebellum     | -   | Koturbash, Zemp        |
| miR-222-3p | 4.3Gy                    | 24h           | <sup>177</sup> Lu-octreotate | mouse renal cortical tissue | +   | present study          |
| miR-223    | 2 Gy                     | 0.5h          | 250 keV x-rays               | foreskin fibroblasts        | -   | Maes, An 2008          |
| miR-223    | 2Gy                      | 1h            | gamma                        | CD34+                       | +   | Li, Ha 2012            |
| miR-223    | 5Gy                      | 6h            | Cs-137                       | Mouse blood                 | +   | Templin, Amundson 2011 |

|             |        |            |             |                           |     |                         |
|-------------|--------|------------|-------------|---------------------------|-----|-------------------------|
| miR-223     | 2.5Gy  | 6h         | 90 kV x-ray | Female mouse spleen       | -   | Ilnytskyy, Zemp 2008    |
| miR-223     | 2Gy    | 4h         | Cs-137      | human PBL                 | +   | Girardi, De Pitta 2012  |
| miR-223     | 1Gy    | 96h        | 90 kV x-ray | Female mouse frontal lobe | -   | Koturbash, Zemp         |
| miR-224     | 0.2Gy  | 0.5, 168h  | gamma       | human 3D tissue system    | -   | Dickey, Zemp 2011       |
| miR-224     | 2Gy    | 0.5, 168h  | gamma       | human 3D tissue system    | -   | Dickey, Zemp 2011       |
| miR-224     | 1.0 Gy | 6 h        | p           | mouse blood               | -   | Templin, Young 2012     |
| miR-224     | 8Gy    | 1h         | gamma       | hFOB                      | +   | Li, Ha 2012             |
| miR-224     | 8Gy    | 6h         | gamma       | HeLa                      | -   | Hu, Tie 2013            |
| miR-224     | 2.5Gy  | 2, 8, 24h  | gamma       | A549                      | -   | Weidhaas, Babar 2007    |
| miR-290     | 2.5Gy  | 6h         | 90 kV x-ray | Female mouse spleen       | +   | Ilnytskyy, Zemp 2008    |
| miR-292-39  | 0.5 Gy | 6, 24h     | p           | mouse blood               | -   | Templin, Young 2012     |
| miR-294     | 1.0 Gy | 6 h        | p           | mouse blood               | +   | Templin, Young 2012     |
| miR-294     | 2.5Gy  | 6h         | 90 kV x-ray | Male mouse spleen         | +   | Ilnytskyy, Zemp 2008    |
| miR-298     | 1Gy    | 96h        | 90 kV x-ray | Female mouse frontal lobe | +   | Koturbash, Zemp         |
| miR-301     | 2.5Gy  | 8h         | gamma       | CRL2741                   | +   | Weidhaas, Babar 2007    |
| miR-301a    | 1.25Gy | 4h         | gamma       | human blood (TBI)         | +   | Templin, Paul 2011      |
| miR-301a    | 2Gy    | 4h         | Cs-137      | human PBL                 | +   | Girardi, De Pitta 2012  |
| miR-302b-5p | 18.8Gy | 4h         | 6 MV photon | U87MG glioblastoma        | -   | Chen, Zhu 2009          |
| miR-320     | 0.2Gy  | 0.5, 168h  | gamma       | human 3D tissue system    | -   | Dickey, Zemp 2011       |
| miR-320     | 2Gy    | 0.5, 168h  | gamma       | human 3D tissue system    | +/- | Dickey, Zemp 2011       |
| miR-320     | 2.5Gy  | 8, 24h     | gamma       | CRL2741                   | -   | Weidhaas, Babar 2007    |
| miR-320     | 2.5Gy  | 2, 8, 24h  | gamma       | A549                      | -   | Weidhaas, Babar 2007    |
| miR-320a    | 8Gy    | 6h         | gamma       | HeLa                      | +   | Hu, Tie 2013            |
| miR-320a    | 8Gy    | 1h         | gamma       | hFOB                      | -   | Li, Ha 2012             |
| miR-320b    | 10 Gy  | 5, 15, 40h | gamma       | PC3                       | -   | Leung, Li 2014          |
| miR-320c    | 8Gy    | 1h         | gamma       | hFOB                      | -   | Li, Ha 2012             |
| miR-320d    | 2Gy    | 1h         | gamma       | CD34+                     | -   | Li, Ha 2012             |
| miR-324-3p  | 2.5Gy  | 2h         | gamma       | A549                      | +   | Weidhaas, Babar 2007    |
| miR-324-3p  | 10Gy   | 8h         | Cs-137      | B lymphoblasts IM9        | +   | Cha, Seong 2009         |
| miR-324-3p  | 2.5Gy  | 6h         | 90 kV x-ray | Female mouse spleen       | +   | Ilnytskyy, Zemp 2008    |
| miR-324-3p  | 1Gy    | 96h        | 90 kV x-ray | Male mouse frontal lobe   | -   | Koturbash, Zemp         |
| miR-324-5p  | 8Gy    | 1h         | gamma       | hFOB                      | -   | Li, Ha 2012             |
| miR-326     | 1Gy    | 4, 24h     | Cs-137      | Normal thyroid cells      | -   | Nikiforova, Gandhi 2011 |

|            |          |            |                              |                              |   |                         |
|------------|----------|------------|------------------------------|------------------------------|---|-------------------------|
| miR-326    | 10Gy     | 4, 24h     | Cs-137                       | Normal thyroid cells         | - | Nikiforova, Gandhi 2011 |
| miR-326    | 10Gy     | 8h         | Cs-137                       | B lymphoblasts IM9           | + | Cha, Seong 2009         |
| miR-326    | 1Gy      | 96h        | 90 kV x-ray                  | Male mouse hippocampus       | - | Koturbash, Zemp         |
| miR-328    | 10Gy     | 8h         | Cs-137                       | B lymphoblasts IM9           | + | Cha, Seong 2009         |
| miR-328    | 2.5Gy    | 6h         | 90 kV x-ray                  | Female mouse spleen          | + | Ilnytsky, Zemp 2008     |
| miR-329    | 1Gy      | 6h         | 90 kV x-ray                  | Male mouse hippocampus       | + | Koturbash, Zemp         |
| miR-330-3p | 2Gy      | 24h        | Cs-137                       | human PBL                    | - | Girardi, De Pitta 2012  |
| miR-331-3p | 6Gy      | 3h         | Cs-137                       | proliferating keratinocytes  | - | Joly-Tonetti, Vinuelas  |
| miR-335    | 8Gy      | 1h         | gamma                        | hFOB                         | + | Li, Ha 2012             |
| miR-335    | 2.5Gy    | 2h         | gamma                        | A549                         | + | Weidhaas, Babar 2007    |
| miR-335    | 18.8Gy   | 4h         | 6 MV photon                  | U87MG glioblastoma           | + | Chen, Zhu 2009          |
| miR-335    | 2Gy      | 24h        | Cs-137                       | human PBL                    | - | Girardi, De Pitta 2012  |
| miR-335-3p | 1.5, 5Gy | 24h        | Cs-137                       | Mouse blood                  | + | Templin, Amundson 2011  |
| miR-337-3p | 5Gy      | 24h        | Cs-137                       | Mouse blood                  | - | Templin, Amundson 2011  |
| miR-338    | 1Gy      | 4, 24h     | Cs-137                       | Normal thyroid cells         | - | Nikiforova, Gandhi 2011 |
| miR-338    | 10Gy     | 4, 24h     | Cs-137                       | Normal thyroid cells         | - | Nikiforova, Gandhi 2011 |
| miR-339    | 10Gy     | 24h        | Cs-137                       | B lymphoblasts IM9           | + | Cha, Shin 2009          |
| miR-339-3p | 5Gy      | 24h        | Cs-137                       | Mouse blood                  | + | Templin, Amundson 2011  |
| miR-339-3p | 0.2Gy    | 4h         | Cs-137                       | human PBL                    | - | Girardi, De Pitta 2012  |
| miR-340    | 1.25Gy   | 4h         | gamma                        | human blood (TBI)            | + | Templin, Paul 2011      |
| miR-341    | 1Gy      | 96h        | 90 kV x-ray                  | Female mouse frontal lobe    | + | Koturbash, Zemp         |
| miR-342    | 10Gy     | 24h        | Cs-137                       | B lymphoblasts IM9           | + | Cha, Shin 2009          |
| mir-342-3p | 6Gy      | 3h         | Cs-137                       | differentiated keratinocytes | + | Joly-Tonetti, Vinuelas  |
| mir-342-3p | 10mGy    | 3h         | Cs-137                       | proliferating keratinocytes  | + | Joly-Tonetti, Vinuelas  |
| mir-342-3p | 5Gy      | 24h        | Cs-137                       | Mouse blood                  | - | Templin, Amundson 2011  |
| mir-342-3p | 0.5Gy    | 24h        | Fe-56                        | Mouse blood                  | - | Templin, Amundson 2011  |
| mir-342-3p | 0.34Gy   | 24h        | <sup>177</sup> Lu-octreotate | mouse renal cortical tissue  | + | present study           |
| mir-342-5p | 10 Gy    | 5, 15, 40h | gamma                        | PC3                          | - | Leung, Li 2014          |
| miR-345    | 20, 40Gy | 24h        | Cs-137                       | lung carcinoma cell A549     | - | Shin, Cha 2009          |
| miR-345    | 0.2Gy    | 4h         | Cs-137                       | human PBL                    | - | Girardi, De Pitta 2012  |
| miR-345    | 2Gy      | 24h        | Cs-137                       | human PBL                    | + | Girardi, De Pitta 2012  |
| miR-346    | 2.5Gy    | 6h         | 90 kV x-ray                  | Male mouse spleen            | + | Ilnytsky, Zemp 2008     |
| miR-346    | 2.5Gy    | 6h         | 90 kV x-ray                  | Female mouse spleen          | + | Ilnytsky, Zemp 2008     |

|             |                  |            |                              |                             |   |                         |
|-------------|------------------|------------|------------------------------|-----------------------------|---|-------------------------|
| miR-346     | 2.5Gy            | 6h         | 90 kV x-ray                  | Male mouse thymus           | - | Ilnytskyy, Zemp 2008    |
| miR-346     | 1Gy              | 96h        | 90 kV x-ray                  | Male mouse frontal lobe     | - | Koturbash, Zemp         |
| miR-350     | 0.1Gy            | 6h         | Fe-56                        | Mouse blood                 | - | Templin, Amundson 2011  |
| miR-361     | 2.5Gy            | 2, 8, 24h  | gamma                        | CRL2741                     | - | Weidhaas, Babar 2007    |
| miR-361     | 8Gy              | 6h         | gamma                        | HeLa                        | + | Hu, Tie 2013            |
| miR-361     | 2.5Gy            | 2, 8, 24h  | gamma                        | A549                        | - | Weidhaas, Babar 2007    |
| miR-361-3p  | 10 Gy            | 5, 15, 40h | gamma                        | PC3                         | - | Leung, Li 2014          |
| miR-361-5p  | 0.34, 1.3, 4.3Gy | 24h        | <sup>177</sup> Lu-octreotate | mouse renal cortical tissue | + | present study           |
| miR-362-5p  | 1.0 Gy           | 24 h       | p                            | mouse blood                 | - | Templin, Young 2012     |
| miR-362-5p  | 1.25Gy           | 4h         | gamma                        | human blood (TBI)           | + | Templin, Paul 2011      |
| miR-363     | 2Gy              | 24h        | Cs-137                       | human PBL                   | + | Girardi, De Pitta 2012  |
| miR-363-3p  | 2.5Gy            | 6h         | 90 kV x-ray                  | Male mouse spleen           | - | Ilnytskyy, Zemp 2008    |
| miR-365     | 1Gy              | 24h        | Cs-137                       | Normal thyroid cells        | - | Nikiforova, Gandhi 2011 |
| miR-365     | 2.5Gy            | 2, 8, 24h  | gamma                        | A549                        | + | Weidhaas, Babar 2007    |
| miR-365     | 8Gy              | 6h         | gamma                        | HeLa                        | - | Hu, Tie 2013            |
| miR-365     | 10Gy             | 24h        | Cs-137                       | B lymphoblasts IM9          | + | Cha, Shin 2009          |
| miR-365-3p  | 0.13Gy           | 24h        | <sup>177</sup> Lu-octreotate | mouse renal cortical tissue | - | present study           |
| miR-368     | 2.5Gy            | 2h         | gamma                        | A549                        | + | Weidhaas, Babar 2007    |
| miR-371-5p  | 2Gy              | 24h        | Cs-137                       | human PBL                   | + | Girardi, De Pitta 2012  |
| miR-372     | 6Gy              | 4h         | 6 MV photons                 | LNCaP prostate cancer cell  | + | Josson, Sung 2008       |
| miR-373     | 8Gy              | 1h         | gamma                        | hFOB                        | + | Li, Ha 2012             |
| miR-374     | 2 Gy             | 4h         | proton                       | Mouse liver                 | + | Khan, Tariq 2013        |
| miR-374a    | 2.5Gy            | 2, 8h      | gamma                        | A549                        | + | Weidhaas, Babar 2007    |
| miR-374a    | 1.25Gy           | 4h         | gamma                        | human blood (TBI)           | + | Templin, Paul 2011      |
| miR-374a-5p | 10 Gy            | 5, 15, 40h | gamma                        | PC3                         | - | Leung, Li 2014          |
| miR-375     | 1Gy              | 96h        | 90 kV x-ray                  | Female mouse cerebellum     | - | Koturbash, Zemp         |
| miR-376a    | 40Gy             | 24h        | Cs-137                       | lung carcinoma cell A549    | + | Shin, Cha 2009          |
| miR-376a    | 0.1 Gy           | 24h        | 250 keV x-rays               | foreskin fibroblasts        | - | Maes, An 2008           |
| miR-376a    | 1.25Gy           | 4h         | gamma                        | human blood (TBI)           | + | Templin, Paul 2011      |
| miR-376a    | 0.05Gy           | 8h         | Cs-137                       | B lymphoblasts IM9          | - | Cha, Seong 2009         |
| miR-377     | 1Gy              | 4h         | Cs-137                       | Normal thyroid cells        | - | Nikiforova, Gandhi 2011 |
| miR-377     | 10Gy             | 4h         | Cs-137                       | Normal thyroid cells        | - | Nikiforova, Gandhi 2011 |
| miR-378     | 0.2, 2Gy         | 4h         | Cs-137                       | human PBL                   | - | Girardi, De Pitta 2012  |

|             |            |               |                              |                             |     |                         |
|-------------|------------|---------------|------------------------------|-----------------------------|-----|-------------------------|
| miR-378a-3p | 0.34       | 24h           | <sup>177</sup> Lu-octreotate | mouse renal cortical tissue | +   | present study           |
| miR-378c    | 0.34       | 24h           | <sup>177</sup> Lu-octreotate | mouse renal cortical tissue | +   | present study           |
| miR-379     | 1.0 Gy     | 6 h           | p                            | mouse blood                 | -   | Templin, Young 2012     |
| miR-379     | 0.5, 1Gy   | 24 h          | p                            | mouse blood                 | -   | Templin, Young 2012     |
| miR-379     | 6Gy        | 4h            | 6 MV photons                 | C4-2 prostate cancer cell   | +   | Josson, Sung 2008       |
| miR-379     | 0.1Gy      | 6h            | Fe-56                        | Mouse blood                 | +   | Templin, Amundson 2011  |
| miR-379     | 18.8Gy     | 4h            | 6 MV photon                  | U87MG glioblastoma          | +   | Chen, Zhu 2009          |
| miR-380-5p  | 1.0 Gy     | 6 h           | p                            | mouse blood                 | -   | Templin, Young 2012     |
| miR-382     | 8Gy        | 1h            | gamma                        | hFOB                        | +   | Li, Ha 2012             |
| miR-382     | 1Gy        | 6, 96h        | 90 kV x-ray                  | Female mouse frontal lobe   | +   | Koturbash, Zemp         |
| miR-383     | 6Gy        | 4h            | 6 MV photons                 | C4-2 prostate cancer cell   | +   | Josson, Sung 2008       |
| miR-383     | 0.1, 0.5Gy | 6h            | Fe-56                        | Mouse blood                 | -   | Templin, Amundson 2011  |
| miR-384     | 1Gy        | 4, 24h        | Cs-137                       | Normal thyroid cells        | -   | Nikiforova, Gandhi 2011 |
| miR-384     | 10Gy       | 4, 24h        | Cs-137                       | Normal thyroid cells        | -   | Nikiforova, Gandhi 2011 |
| miR-384     | 1Gy        | 96h           | 90 kV x-ray                  | Female mouse hippocampus    | +   | Koturbash, Zemp         |
| miR-409-3p  | 0.1Gy      | 24h           | Fe-56                        | Mouse blood                 | +   | Templin, Amundson 2011  |
| miR-409-5p  | 1Gy        | 4, 24h        | Cs-137                       | Normal thyroid cells        | +/- | Nikiforova, Gandhi 2011 |
| miR-409-5p  | 10Gy       | 4, 24h        | Cs-137                       | Normal thyroid cells        | +/- | Nikiforova, Gandhi 2011 |
| miR-409-5p  | 2 Gy       | 4h            | proton                       | Mouse brain                 | +   | Khan, Tariq 2013        |
| miR-409-5p  | 2 Gy       | 4h            | proton                       | Mouse testis                | +   | Khan, Tariq 2013        |
| miR-411     | 1.0 Gy     | 6 h           | p                            | mouse blood                 | -   | Templin, Young 2012     |
| miR-411     | 1Gy        | 96h           | 90 kV x-ray                  | Female mouse hippocampus    | +   | Koturbash, Zemp         |
| miR-412-5p  | 2 Gy       | 4h            | proton                       | Mouse brain                 | +   | Khan, Tariq 2013        |
| miR-421     | 0.1 Gy     | 0.5h          | 250 keV x-rays               | foreskin fibroblasts        | -   | Maes, An 2008           |
| miR-421     | 2Gy        | 24h           | Cs-137                       | human PBL                   | +   | Girardi, De Pitta 2012  |
| miR-423-3p  | 2 Gy       | 4h            | proton                       | Mouse testis                | +   | Khan, Tariq 2013        |
| miR-423-5p  | 2Gy        | 168h          | gamma                        | human 3D tissue system      | +   | Dickey, Zemp 2011       |
| miR-424     | 2.5Gy      | 2, 8, 24h     | gamma                        | CRL2741                     | -   | Weidhaas, Babar 2007    |
| miR-424     | 2.5Gy      | 2, 8, 24h     | gamma                        | A549                        | -   | Weidhaas, Babar 2007    |
| miR-424-3p  | 0.2, 2Gy   | 24h           | Cs-137                       | human PBL                   | +   | Girardi, De Pitta 2012  |
| miR-425     | 0.2, 2Gy   | 0.5, 48, 168h | gamma                        | human 3D tissue system      | +   | Dickey, Zemp 2011       |
| miR-425-3p  | 0.2Gy      | 4h            | Cs-137                       | human PBL                   | +   | Girardi, De Pitta 2012  |
| miR-425-5p  | 1.3, 4.3Gy | 24h           | <sup>177</sup> Lu-octreotate | mouse renal cortical tissue | +   | present study           |



|             |             |               |                              |                             |    |                         |
|-------------|-------------|---------------|------------------------------|-----------------------------|----|-------------------------|
| miR-429     | 2.5Gy       | 8, 24h        | gamma                        | CRL2741                     | +  | Weidhaas, Babar 2007    |
| miR-429     | 1Gy         | 6h            | 90 kV x-ray                  | Female mouse frontal lobe   | +  | Koturbash, Zemp         |
| miR-432     | 10Gy        | 24h           | Cs-137                       | B lymphoblasts IM9          | -  | Cha, Shin 2009          |
| miR-434-3p  | 1Gy         | 6h            | 90 kV x-ray                  | Male mouse frontal lobe     | +  | Koturbash, Zemp         |
| miR-449     | 6Gy         | 4h            | 6 MV photons                 | LNCaP prostate cancer cell  | +  | Josson, Sung 2008       |
| miR-449a    | 0.2Gy       | 0.5, 48h      | gamma                        | human 3D tissue system      | +  | Dickey, Zemp 2011       |
| miR-449a    | 2Gy         | 0.5, 48, 168h | gamma                        | human 3D tissue system      | +- | Dickey, Zemp 2011       |
| miR-449b    | 0.2Gy       | 0.5, 48, 168h | gamma                        | human 3D tissue system      | +  | Dickey, Zemp 2011       |
| miR-449b    | 2Gy         | 0.5, 48, 168h | gamma                        | human 3D tissue system      | +- | Dickey, Zemp 2011       |
| miR-450     | 2.5Gy       | 2, 24h        | gamma                        | A549                        | +  | Weidhaas, Babar 2007    |
| miR-450a    | 0.2Gy       | 4h            | Cs-137                       | human PBL                   | +  | Girardi, De Pitta 2012  |
| miR-450a-5p | 5Gy         | 6h            | Cs-137                       | Mouse blood                 | +  | Templin, Amundson 2011  |
| miR-451     | 18.8Gy      | 4h            | 6 MV photon                  | U87MG glioblastoma          | +  | Chen, Zhu 2009          |
| miR-451     | 1Gy         | 6h            | 90 kV x-ray                  | Female mouse frontal lobe   | -  | Koturbash, Zemp         |
| miR-451     | 2 Gy        | 4h            | proton                       | Mouse testis                | -  | Khan, Tariq 2013        |
| miR-451a    | 4.3Gy       | 24h           | <sup>177</sup> Lu-octreotate | mouse renal cortical tissue | +  | present study           |
| miR-452     | 1Gy         | 24h           | Cs-137                       | Normal thyroid cells        | +  | Nikiforova, Gandhi 2011 |
| miR-452     | 10Gy        | 4, 24h        | Cs-137                       | Normal thyroid cells        | +- | Nikiforova, Gandhi 2011 |
| miR-452-3p  | 2.5Gy       | 2h            | gamma                        | A549                        | +  | Weidhaas, Babar 2007    |
| miR-453     | 1Gy         | 4, 24h        | Cs-137                       | Normal thyroid cells        | +- | Nikiforova, Gandhi 2011 |
| miR-453     | 10Gy        | 4, 24h        | Cs-137                       | Normal thyroid cells        | +- | Nikiforova, Gandhi 2011 |
| miR-454     | 2Gy         | 1h            | gamma                        | CD34+                       | -  | Li, Ha 2012             |
| miR-454     | 1.25Gy      | 4h            | gamma                        | human blood (TBI)           | +  | Templin, Paul 2011      |
| miR-455-3p  | 1Gy         | 6, 96h        | 90 kV x-ray                  | Male mouse frontal lobe     | -  | Koturbash, Zemp         |
| mir-466     | 8Gy         | 1h            | gamma                        | hFOB                        | +  | Li, Ha 2012             |
| miR-467a-5p | 1Gy         | 96h           | 90 kV x-ray                  | Female mouse hippocampus    | +  | Koturbash, Zemp         |
| miR-467b    | 2.5Gy       | 6h            | 90 kV x-ray                  | Male mouse thymus           | -  | Ilnytsky, Zemp 2008     |
| miR-467d    | 2 Gy        | 4h            | proton                       | Mouse testis                | -  | Khan, Tariq 2013        |
| miR-483     | 1Gy         | 96h           | 90 kV x-ray                  | Female mouse cerebellum     | +  | Koturbash, Zemp         |
| miR-483-5p  | 2Gy         | 24h           | Cs-137                       | human PBL                   | +  | Girardi, De Pitta 2012  |
| miR-484     | 0.34, 1.3Gy | 24h           | <sup>177</sup> Lu-octreotate | mouse renal cortical tissue | +  | present study           |
| miR-485-3p  | 8Gy         | 1h            | gamma                        | hFOB                        | +  | Li, Ha 2012             |
| miR-486-5p  | 2Gy         | 1h            | gamma                        | CD34+                       | +  | Li, Ha 2012             |

|             |        |            |              |                            |   |                             |
|-------------|--------|------------|--------------|----------------------------|---|-----------------------------|
| miR-487     | 6Gy    | 4h         | 6 MV photons | LNCaP prostate cancer cell | - | Josson, Sung 2008           |
| miR-488     | 6Gy    | 4h         | 6 MV photons | C4-2 prostate cancer cell  | + | Josson, Sung 2008           |
| miR-488     | 1Gy    | 96h        | 90 kV x-ray  | Female mouse hippocampus   | + | Koturbash, Zemp             |
| miR-488-5p  | 1Gy    | 6h         | 90 kV x-ray  | Male mouse hippocampus     | - | Koturbash, Zemp             |
| miR-488-5p  | 1Gy    | 6, 96h     | 90 kV x-ray  | Male mouse cerebellum      | + | Koturbash, Zemp             |
| miR-489     | 1Gy    | 4, 24      | Cs-137       | Normal thyroid cells       | + | Nikiforova, Gandhi 2011     |
| miR-489     | 10Gy   | 4, 24      | Cs-137       | Normal thyroid cells       | + | Nikiforova, Gandhi 2011     |
| miR-489     | 8Gy    | 1h         | gamma        | hFOB                       | + | Li, Ha 2012                 |
| miR-493     | 8Gy    | 1h         | gamma        | hFOB                       | + | Li, Ha 2012                 |
| miR-494     | 0.5Gy  | 24h        | Fe-56        | Mouse blood                | - | Templin, Amundson 2011      |
| miR-494     | 0.2Gy  | 4h         | Cs-137       | human PBL                  | - | Girardi, De Pitta 2012      |
| miR-494     | 2Gy    | 24h        | Cs-137       | human PBL                  | + | Girardi, De Pitta 2012      |
| miR-495     | 0.5 Gy | 6 h        | p            | mouse blood                | - | Templin, Young 2012         |
| miR-497     | 2 Gy   | 4h         | proton       | Mouse testis               | - | Khan, Tariq 2013            |
| miR-500     | 18.8Gy | 4h         | 6 MV photon  | U87MG glioblastoma         | + | Chen, Zhu 2009              |
| miR-501-3p  | 0.5 Gy | 6 h        | p            | mouse blood                | + | Templin, Young 2012         |
| miR-501-3p  | 5Gy    | 24h        | Cs-137       | Mouse blood                | + | Templin, Amundson 2011      |
| miR-501-3p  | 0.5Gy  | 6h         | Fe-56        | Mouse blood                | + | Templin, Amundson 2011      |
| miR-501-3p  | 2 Gy   | 4h         | proton       | Mouse brain                | + | Khan, Tariq 2013            |
| miR-501-3p  | 2 Gy   | 4h         | proton       | Mouse testis               | + | Khan, Tariq 2013            |
| miR-501-3p  | 10 Gy  | 5, 15, 40h | gamma        | PC3                        | - | Leung, Li 2014              |
| miR-502-3p  | 2Gy    | 1h         | gamma        | CD34+                      | - | Li, Ha 2012                 |
| miR-502-5p  | 1.25Gy | 4h         | gamma        | human blood (TBI)          | + | Templin, Paul 2011          |
| miR-503     | 2 Gy   | 6h         | 6MV gamma    | endoth cells               | - | Wagner-Ecker, Schwager 2010 |
| miR-503     | 2.5Gy  | 8, 24h     | gamma        | CRL2741                    | - | Weidhaas, Babar 2007        |
| miR-503     | 2.5Gy  | 2h         | gamma        | A549                       | - | Weidhaas, Babar 2007        |
| miR-505     | 8Gy    | 1h         | gamma        | hFOB                       | - | Li, Ha 2012                 |
| miR-505-5p  | 2Gy    | 24h        | Cs-137       | human PBL                  | - | Girardi, De Pitta 2012      |
| miR-511     | 1.0 Gy | 6 h        | p            | mouse blood                | + | Templin, Young 2012         |
| miR-511     | 0.5Gy  | 6h         | Cs-137       | Mouse blood                | + | Templin, Amundson 2011      |
| miR-511     | 5Gy    | 24h        | Cs-137       | Mouse blood                | + | Templin, Amundson 2011      |
| miR-513a-5p | 2Gy    | 4h         | Cs-137       | human PBL                  | - | Girardi, De Pitta 2012      |
| miR-513a-5p | 2Gy    | 24h        | Cs-137       | human PBL                  | + | Girardi, De Pitta 2012      |

|             |          |            |                |                            |     |                         |
|-------------|----------|------------|----------------|----------------------------|-----|-------------------------|
| miR-513b    | 0.2, 2Gy | 4h         | Cs-137         | human PBL                  | -   | Girardi, De Pitta 2012  |
| miR-513b    | 2Gy      | 24h        | Cs-137         | human PBL                  | +   | Girardi, De Pitta 2012  |
| miR-513c    | 2Gy      | 24h        | Cs-137         | human PBL                  | +   | Girardi, De Pitta 2012  |
| miR-516a-5p | 20, 40Gy | 24h        | Cs-137         | lung carcinoma cell A549   | -   | Shin, Cha 2009          |
| miR-517c    | 2 Gy     | 0.5h       | 250 keV x-rays | foreskin fibroblasts       | -   | Maes, An 2008           |
| miR-518b    | 18.8Gy   | 4h         | 6 MV photon    | U87MG glioblastoma         | -   | Chen, Zhu 2009          |
| miR-520a    | 1Gy      | 4, 24h     | Cs-137         | Normal thyroid cells       | +   | Nikiforova, Gandhi 2011 |
| miR-520a    | 10Gy     | 4, 24h     | Cs-137         | Normal thyroid cells       | +   | Nikiforova, Gandhi 2011 |
| miR-520b    | 1, 10Gy  | 24h        | Cs-137         | B lymphoblasts IM9         | +   | Cha, Shin 2009          |
| miR-520c    | 6Gy      | 4h         | 6 MV photons   | LNCaP prostate cancer cell | +   | Josson, Sung 2008       |
| miR-520d    | 2 Gy     | 0.5h       | 250 keV x-rays | foreskin fibroblasts       | -   | Maes, An 2008           |
| miR-520d    | 1, 10Gy  | 24h        | Cs-137         | B lymphoblasts IM9         | -   | Cha, Shin 2009          |
| miR-520e    | 1Gy      | 4, 24h     | Cs-137         | Normal thyroid cells       | +/- | Nikiforova, Gandhi 2011 |
| miR-520e    | 10Gy     | 4h         | Cs-137         | Normal thyroid cells       | -   | Nikiforova, Gandhi 2011 |
| miR-520f    | 6Gy      | 4h         | 6 MV photons   | LNCaP prostate cancer cell | +   | Josson, Sung 2008       |
| miR-521     | 6Gy      | 4h         | 6 MV photons   | LNCaP prostate cancer cell | -   | Josson, Sung 2008       |
| miR-521     | 6Gy      | 4h         | 6 MV photons   | C4-2 prostate cancer cell  | -   | Josson, Sung 2008       |
| miR-521     | 18.8Gy   | 4h         | 6 MV photon    | U87MG glioblastoma         | -   | Chen, Zhu 2009          |
| mir-522     | 1Gy      | 4, 24h     | Cs-137         | Normal thyroid cells       | -   | Nikiforova, Gandhi 2011 |
| mir-522     | 10Gy     | 4, 24h     | Cs-137         | Normal thyroid cells       | -   | Nikiforova, Gandhi 2011 |
| miR-526b    | 1Gy      | 4, 24h     | Cs-137         | Normal thyroid cells       | +/- | Nikiforova, Gandhi 2011 |
| miR-526b    | 10Gy     | 4, 24h     | Cs-137         | Normal thyroid cells       | +/- | Nikiforova, Gandhi 2011 |
| miR-532-5p  | 2Gy      | 1h         | gamma          | CD34+                      | -   | Li, Ha 2012             |
| miR-539     | 10Gy     | 24h        | Cs-137         | B lymphoblasts IM9         | +   | Cha, Shin 2009          |
| miR-542-5p  | 2.5Gy    | 8, 24h     | gamma          | CRL2741                    | -   | Weidhaas, Babar 2007    |
| miR-543     | 1Gy      | 6h         | 90 kV x-ray    | Female mouse frontal lobe  | -   | Koturbash, Zemp         |
| miR-543     | 1Gy      | 96h        | 90 kV x-ray    | Female mouse frontal lobe  | -   | Koturbash, Zemp         |
| miR-547     | 1.5Gy    | 6h         | Cs-137         | Mouse blood                | -   | Templin, Amundson 2011  |
| miR-548b-3p | 2 Gy     | 2h         | 250 keV x-rays | foreskin fibroblasts       | +   | Maes, An 2008           |
| miR-548c-3p | 20, 40Gy | 24h        | Cs-137         | lung carcinoma cell A549   | -   | Shin, Cha 2009          |
| miR-548d    | 18.8Gy   | 4h         | 6 MV photon    | U87MG glioblastoma         | +   | Chen, Zhu 2009          |
| miR-548d-3p | 1.25Gy   | 4h         | gamma          | human blood (TBI)          | +   | Templin, Paul 2011      |
| miR-548h-5p | 10 Gy    | 5, 15, 40h | gamma          | PC3                        | +   | Leung, Li 2014          |

|             |          |            |                |                          |   |                        |
|-------------|----------|------------|----------------|--------------------------|---|------------------------|
| miR-550a-3p | 10 Gy    | 5, 15, 40h | gamma          | PC3                      | + | Leung, Li 2014         |
| miR-551b    | 2Gy      | 24h        | Cs-137         | human PBL                | - | Girardi, De Pitta 2012 |
| miR-557     | 1, 10Gy  | 24h        | Cs-137         | B lymphoblasts IM9       | + | Cha, Shin 2009         |
| miR-558     | 2 Gy     | 2h         | 250 keV x-rays | foreskin fibroblasts     | + | Maes, An 2008          |
| miR-560     | 1, 10Gy  | 24h        | Cs-137         | B lymphoblasts IM9       | + | Cha, Shin 2009         |
| miR-564     | 2 Gy     | 0.5h       | 250 keV x-rays | foreskin fibroblasts     | - | Maes, An 2008          |
| miR-564     | 1Gy      | 24h        | Cs-137         | B lymphoblasts IM9       | + | Cha, Shin 2009         |
| miR-565     | 2.5Gy    | 2, 8h      | gamma          | A549                     | + | Weidhaas, Babar 2007   |
| miR-570     | 1.25Gy   | 4h         | gamma          | human blood (TBI)        | + | Templin, Paul 2011     |
| miR-572     | 1, 10Gy  | 24h        | Cs-137         | B lymphoblasts IM9       | + | Cha, Shin 2009         |
| miR-574-3p  | 0.2Gy    | 0.5h       | gamma          | human 3D tissue system   | - | Dickey, Zemp 2011      |
| miR-574-3p  | 2Gy      | 0.5, 48h   | gamma          | human 3D tissue system   | - | Dickey, Zemp 2011      |
| miR-574-5p  | 0.2Gy    | 0.5, 48h   | gamma          | human 3D tissue system   | - | Dickey, Zemp 2011      |
| miR-574-5p  | 2Gy      | 0.5, 48h   | gamma          | human 3D tissue system   | - | Dickey, Zemp 2011      |
| miR-574-5p  | 2Gy      | 24h        | Cs-137         | human PBL                | + | Girardi, De Pitta 2012 |
| miR-575     | 2Gy      | 1h         | gamma          | CD34+                    | - | Li, Ha 2012            |
| miR-575     | 1, 10Gy  | 24h        | Cs-137         | B lymphoblasts IM9       | + | Cha, Shin 2009         |
| miR-575     | 2Gy      | 4h         | Cs-137         | human PBL                | - | Girardi, De Pitta 2012 |
| miR-579     | 2 Gy     | 0.5h       | 250 keV x-rays | foreskin fibroblasts     | - | Maes, An 2008          |
| miR-582     | 2.5Gy    | 2, 8, 24h  | gamma          | A549                     | + | Weidhaas, Babar 2007   |
| miR-582     | 18.8Gy   | 4h         | 6 MV photon    | U87MG glioblastoma       | - | Chen, Zhu 2009         |
| miR-582-5p  | 2 Gy     | 2h         | 250 keV x-rays | foreskin fibroblasts     | + | Maes, An 2008          |
| miR-582-5p  | 0.2, 2Gy | 4h         | Cs-137         | human PBL                | + | Girardi, De Pitta 2012 |
| miR-583     | 1, 10Gy  | 24h        | Cs-137         | B lymphoblasts IM9       | + | Cha, Shin 2009         |
| miR-584     | 2.5Gy    | 24h        | gamma          | CRL2741                  | - | Weidhaas, Babar 2007   |
| miR-585     | 2 Gy     | 2h         | 250 keV x-rays | foreskin fibroblasts     | + | Maes, An 2008          |
| miR-592     | 1Gy      | 96h        | 90 kV x-ray    | Female mouse hippocampus | + | Koturbash, Zemp        |
| miR-593     | 20 Gy    | 24h        | Cs-137         | lung carcinoma cell A549 | - | Shin, Cha 2009         |
| miR-594     | 2.5Gy    | 2, 8, 24h  | gamma          | CRL2741                  | - | Weidhaas, Babar 2007   |
| miR-594     | 2.5Gy    | 2, 24h     | gamma          | A549                     | - | Weidhaas, Babar 2007   |
| miR-595     | 10Gy     | 24h        | Cs-137         | B lymphoblasts IM9       | + | Cha, Shin 2009         |
| miR-598     | 1.0 Gy   | 6, 24h     | p              | mouse blood              | - | Templin, Young 2012    |
| miR-598     | 0.1 Gy   | 24h        | 250 keV x-rays | foreskin fibroblasts     | - | Maes, An 2008          |

|            |                          |           |                |                          |    |                        |
|------------|--------------------------|-----------|----------------|--------------------------|----|------------------------|
| miR-598    | 1.25Gy                   | 4h        | gamma          | human blood (TBI)        | +  | Templin, Paul 2011     |
| miR-598    | 0.5Gy                    | 6h        | Cs-137         | Mouse blood              | +  | Templin, Amundson 2011 |
| miR-601    | 18.8Gy                   | 4h        | 6 MV photon    | U87MG glioblastoma       | +  | Chen, Zhu 2009         |
| miR-601    | 0.2Gy                    | 24h       | Cs-137         | human PBL                | +  | Girardi, De Pitta 2012 |
| miR-605    | 2Gy                      | 1h        | gamma          | CD34+                    | -  | Li, Ha 2012            |
| miR-605    | 2.5Gy                    | 8h        | gamma          | CRL2741                  | -  | Weidhaas, Babar 2007   |
| miR-608    | 2 Gy                     | 0.5h      | 250 keV x-rays | foreskin fibroblasts     | -  | Maes, An 2008          |
| miR-609    | 2 Gy                     | 0.5h      | 250 keV x-rays | foreskin fibroblasts     | -  | Maes, An 2008          |
| miR-609    | 2 Gy                     | 6h        | 250 keV x-rays | foreskin fibroblasts     | -  | Maes, An 2008          |
| miR-612    | 2.5Gy                    | 8h        | gamma          | A549                     | +  | Weidhaas, Babar 2007   |
| miR-617    | 2 Gy                     | 0.5h      | 250 keV x-rays | foreskin fibroblasts     | -  | Maes, An 2008          |
| miR-617    | 1Gy                      | 24h       | Cs-137         | B lymphoblasts IM9       | +  | Cha, Shin 2009         |
| miR-620    | 18.8Gy                   | 4h        | 6 MV photon    | U87MG glioblastoma       | -  | Chen, Zhu 2009         |
| miR-623    | 2 Gy                     | 0.5h      | 250 keV x-rays | foreskin fibroblasts     | -  | Maes, An 2008          |
| miR-625    | 8Gy                      | 1h        | gamma          | hFOB                     | +  | Li, Ha 2012            |
| miR-628-3p | 8Gy                      | 1h        | gamma          | hFOB                     | +  | Li, Ha 2012            |
| miR-629-3p | 0.2Gy                    | 4h        | Cs-137         | human PBL                | +  | Girardi, De Pitta 2012 |
| miR-630    | 1, 10Gy                  | 24h       | Cs-137         | B lymphoblasts IM9       | +  | Cha, Shin 2009         |
| miR-630    | 0.2, 2Gy                 | 4h        | Cs-137         | human PBL                | -  | Girardi, De Pitta 2012 |
| miR-630    | 2Gy                      | 24h       | Cs-137         | human PBL                | +  | Girardi, De Pitta 2012 |
| miR-636    | 20 Gy                    | 24h       | Cs-137         | lung carcinoma cell A549 | -  | Shin, Cha 2009         |
| miR-638    | 0.25, 0.5, 1, 3, 5, 10Gy | 1h        | Co-60          | NorHuFib                 | -  | Simone, Soule 2009     |
| miR-638    | 2Gy                      | 1h        | gamma          | CD34+                    | -  | Li, Ha 2012            |
| miR-638    | 2.5Gy                    | 2, 8, 24h | gamma          | CRL2741                  | +- | Weidhaas, Babar 2007   |
| miR-638    | 2.5Gy                    | 2, 8h     | gamma          | A549                     | +- | Weidhaas, Babar 2007   |
| miR-638    | 1, 10Gy                  | 24h       | Cs-137         | B lymphoblasts IM9       | +  | Cha, Shin 2009         |
| miR-638    | 0.2, 2Gy                 | 24h       | Cs-137         | human PBL                | +  | Girardi, De Pitta 2012 |
| miR-641    | 18.8Gy                   | 4h        | 6 MV photon    | U87MG glioblastoma       | +  | Chen, Zhu 2009         |
| miR-646    | 18.8Gy                   | 4h        | 6 MV photon    | U87MG glioblastoma       | +  | Chen, Zhu 2009         |
| miR-648    | 0.1 Gy                   | 0.5h      | 250 keV x-rays | foreskin fibroblasts     | -  | Maes, An 2008          |
| miR-654    | 10Gy                     | 24h       | Cs-137         | B lymphoblasts IM9       | +  | Cha, Shin 2009         |
| miR-656    | 0.1 Gy                   | 0.5h      | 250 keV x-rays | foreskin fibroblasts     | -  | Maes, An 2008          |
| miR-659    | 0.1 Gy                   | 24h       | 250 keV x-rays | foreskin fibroblasts     | -  | Maes, An 2008          |

|            |                          |            |                              |                             |   |                        |
|------------|--------------------------|------------|------------------------------|-----------------------------|---|------------------------|
| miR-660    | 2 Gy                     | 24h        | 250 keV x-rays               | foreskin fibroblasts        | - | Maes, An 2008          |
| miR-660    | 1.25Gy                   | 4h         | gamma                        | human blood (TBI)           | + | Templin, Paul 2011     |
| miR-662    | 2 Gy                     | 2h         | 250 keV x-rays               | foreskin fibroblasts        | + | Maes, An 2008          |
| miR-663    | 0.25, 0.5, 1, 3, 5, 10Gy | 1h         | Co-60                        | NorHuFib                    | + | Simone, Soule 2009     |
| miR-663    | 2 Gy                     | 0.5h       | 250 keV x-rays               | foreskin fibroblasts        | - | Maes, An 2008          |
| miR-663    | 2.5Gy                    | 24h        | gamma                        | CRL2741                     | + | Weidhaas, Babar 2007   |
| miR-663    | 2.5Gy                    | 8, 24h     | gamma                        | A549                        | + | Weidhaas, Babar 2007   |
| miR-663    | 1, 10Gy                  | 24h        | Cs-137                       | B lymphoblasts IM9          | + | Cha, Shin 2009         |
| miR-663    | 0.2, 2Gy                 | 24h        | Cs-137                       | human PBL                   | + | Girardi, De Pitta 2012 |
| miR-667    | 0.5 Gy                   | 6 h        | p                            | mouse blood                 | - | Templin, Young 2012    |
| miR-667    | 1.0 Gy                   | 24 h       | p                            | mouse blood                 | + | Templin, Young 2012    |
| miR-667    | 1.5, 5Gy                 | 24h        | Cs-137                       | Mouse blood                 | - | Templin, Amundson 2011 |
| miR-667    | 1Gy                      | 6h         | 90 kV x-ray                  | Female mouse cerebellum     | - | Koturbash, Zemp        |
| miR-671    | 1Gy                      | 24h        | Cs-137                       | B lymphoblasts IM9          | + | Cha, Shin 2009         |
| miR-671-3p | 10 Gy                    | 5, 15, 40h | gamma                        | PC3                         | - | Leung, Li 2014         |
| miR-674    | 2 Gy                     | 4h         | proton                       | Mouse brain                 | + | Khan, Tariq 2013       |
| miR-676-5p | 1Gy                      | 6h         | 90 kV x-ray                  | Female mouse frontal lobe   | - | Koturbash, Zemp        |
| miR-677-3p | 1.3Gy                    | 24h        | <sup>177</sup> Lu-octreotate | mouse renal cortical tissue | + | present study          |
| miR-678    | 2.5Gy                    | 6h         | 90 kV x-ray                  | Male mouse thymus           | - | Ilnytskyy, Zemp 2008   |
| miR-680    | 1.5, 5Gy                 | 6h         | Cs-137                       | Mouse blood                 | + | Templin, Amundson 2011 |
| miR-680    | 0.5Gy                    | 6h         | Fe-56                        | Mouse blood                 | + | Templin, Amundson 2011 |
| miR-685    | 1.0 Gy                   | 24 h       | p                            | mouse blood                 | + | Templin, Young 2012    |
| miR-685    | 1.5, 5Gy                 | 6h         | Cs-137                       | Mouse blood                 | + | Templin, Amundson 2011 |
| miR-685    | 0.1Gy                    | 24h        | Fe-56                        | Mouse blood                 | + | Templin, Amundson 2011 |
| miR-685    | 1Gy                      | 96h        | 90 kV x-ray                  | Female mouse frontal lobe   | + | Koturbash, Zemp        |
| miR-689    | 2.5Gy                    | 6h         | 90 kV x-ray                  | Male mouse spleen           | + | Ilnytskyy, Zemp 2008   |
| miR-690    | 13Gy                     | 24h        | <sup>177</sup> Lu-octreotate | mouse renal cortical tissue | - | present study          |
| miR-690    | 2 Gy                     | 4h         | proton                       | Mouse liver                 | + | Khan, Tariq 2013       |
| miR-702    | 1Gy                      | 96h        | 90 kV x-ray                  | Female mouse hippocampus    | - | Koturbash, Zemp        |
| miR-704    | 1Gy                      | 96h        | 90 kV x-ray                  | Female mouse cerebellum     | - | Koturbash, Zemp        |
| miR-705    | 2.5Gy                    | 6h         | 90 kV x-ray                  | Male mouse thymus           | - | Ilnytskyy, Zemp 2008   |
| miR-706    | 2.5Gy                    | 6h         | 90 kV x-ray                  | Male mouse thymus           | - | Ilnytskyy, Zemp 2008   |
| miR-708    | 1.5Gy                    | 6h         | Cs-137                       | Mouse blood                 | - | Templin, Amundson 2011 |

|            |                          |        |                              |                             |   |                        |
|------------|--------------------------|--------|------------------------------|-----------------------------|---|------------------------|
| miR-708    | 1Gy                      | 96h    | 90 kV x-ray                  | Male mouse frontal lobe     | - | Koturbash, Zemp        |
| miR-708-5p | 6Gy                      | 3h     | Cs-137                       | proliferating keratinocytes | - | Joly-Tonetti, Vinuelas |
| miR-708-5p | 10mGy                    | 3h     | Cs-137                       | proliferating keratinocytes | + | Joly-Tonetti, Vinuelas |
| miR-709    | 13Gy                     | 24h    | <sup>177</sup> Lu-octreotate | mouse renal cortical tissue | - | present study          |
| miR-711    | 2.5Gy                    | 6h     | 90 kV x-ray                  | Male mouse thymus           | - | Ilnytskyy, Zemp 2008   |
| miR-712    | 2 Gy                     | 4h     | proton                       | Mouse testis                | - | Khan, Tariq 2013       |
| miR-715    | 1Gy                      | 96h    | 90 kV x-ray                  | Female mouse cerebellum     | + | Koturbash, Zemp        |
| miR-718    | 8Gy                      | 1h     | gamma                        | hFOB                        | - | Li, Ha 2012            |
| miR-720    | 2Gy                      | 1h     | gamma                        | CD34+                       | + | Li, Ha 2012            |
| miR-720    | 1Gy                      | 96h    | 90 kV x-ray                  | Male mouse cerebellum       | + | Koturbash, Zemp        |
| miR-720    | 1Gy                      | 6, 96h | 90 kV x-ray                  | Female mouse frontal lobe   | + | Koturbash, Zemp        |
| miR-720    | 2 Gy                     | 4h     | proton                       | Mouse testis                | + | Khan, Tariq 2013       |
| miR-741    | 1.0 Gy                   | 24 h   | p                            | mouse blood                 | + | Templin, Young 2012    |
| miR-760    | 20 Gy                    | 24h    | Cs-137                       | lung carcinoma cell A549    | - | Shin, Cha 2009         |
| miR-760    | 0.2Gy                    | 24h    | Cs-137                       | human PBL                   | + | Girardi, De Pitta 2012 |
| miR-765    | 8Gy                      | 1h     | gamma                        | hFOB                        | + | Li, Ha 2012            |
| miR-765    | 0.2, 2Gy                 | 24h    | Cs-137                       | human PBL                   | + | Girardi, De Pitta 2012 |
| mir-766    | 2Gy                      | 1h     | gamma                        | CD34+                       | + | Li, Ha 2012            |
| miR-768-3p | 0.25, 0.5, 1, 3, 5, 10Gy | 1h     | Co-60                        | NorHuFib                    | + | Simone, Soule 2009     |
| miR-768-5p | 0.25, 0.5, 1, 3, 5, 10Gy | 1h     | Co-60                        | NorHuFib                    | + | Simone, Soule 2009     |
| miR-768-5p | 2Gy                      | 4h     | Cs-137                       | human PBL                   | - | Girardi, De Pitta 2012 |
| miR-769-5p | 2Gy                      | 24h    | Cs-137                       | human PBL                   | - | Girardi, De Pitta 2012 |
| miR-801    | 0.2Gy                    | 4h     | Cs-137                       | human PBL                   | - | Girardi, De Pitta 2012 |
| miR-801    | 2Gy                      | 24h    | Cs-137                       | human PBL                   | + | Girardi, De Pitta 2012 |
| miR-872    | 2 Gy                     | 4h     | proton                       | Mouse testis                | - | Khan, Tariq 2013       |
| miR-873    | 2Gy                      | 24h    | Cs-137                       | human PBL                   | - | Girardi, De Pitta 2012 |
| miR-877-3p | 2Gy                      | 24h    | Cs-137                       | human PBL                   | + | Girardi, De Pitta 2012 |
| miR-879    | 0.5Gy                    | 24h    | Fe-56                        | Mouse blood                 | + | Templin, Amundson 2011 |
| miR-885-3p | 20, 40Gy                 | 24h    | Cs-137                       | lung carcinoma cell A549    | - | Shin, Cha 2009         |
| miR-886-3p | 0.2, 2Gy                 | 4h     | Cs-137                       | human PBL                   | - | Girardi, De Pitta 2012 |
| miR-886-3p | 0.2Gy                    | 24h    | Cs-137                       | human PBL                   | - | Girardi, De Pitta 2012 |
| miR-923    | 0.2, 2Gy                 | 4h     | Cs-137                       | human PBL                   | - | Girardi, De Pitta 2012 |
| miR-923    | 2Gy                      | 24h    | Cs-137                       | human PBL                   | + | Girardi, De Pitta 2012 |

|              |                      |     |                              |                             |   |                        |
|--------------|----------------------|-----|------------------------------|-----------------------------|---|------------------------|
| miR-940      | 2Gy                  | 4h  | Cs-137                       | human PBL                   | + | Girardi, De Pitta 2012 |
| miR-940      | 2Gy                  | 24h | Cs-137                       | human PBL                   | + | Girardi, De Pitta 2012 |
| miR-1225-5p  | 0.2, 2Gy             | 24h | Cs-137                       | human PBL                   | + | Girardi, De Pitta 2012 |
| miR-1226-5p  | 0.2Gy                | 24h | Cs-137                       | human PBL                   | + | Girardi, De Pitta 2012 |
| miR-1228     | 40Gy                 | 24h | Cs-137                       | lung carcinoma cell A549    | - | Shin, Cha 2009         |
| miR-1247     | 2 Gy                 | 4h  | proton                       | Mouse testis                | - | Khan, Tariq 2013       |
| miR-1260b    | 2Gy                  | 1h  | gamma                        | CD34+                       | + | Li, Ha 2012            |
| mir-1275     | 2Gy                  | 1h  | gamma                        | CD34+                       | - | Li, Ha 2012            |
| miR-1280     | 2Gy                  | 1h  | gamma                        | CD34+                       | + | Li, Ha 2012            |
| miR-1281     | 2Gy                  | 1h  | gamma                        | CD34+                       | - | Li, Ha 2012            |
| miR-1305     | 8Gy                  | 1h  | gamma                        | hFOB                        | + | Li, Ha 2012            |
| miR-1826     | 8Gy                  | 1h  | gamma                        | hFOB                        | + | Li, Ha 2012            |
| miR-1839-3p  | 4.3Gy                | 24h | <sup>177</sup> Lu-octreotate | mouse renal cortical tissue | + | present study          |
| miR-1902     | 13 Gy                | 24h | <sup>177</sup> Lu-octreotate | mouse renal cortical tissue | - | present study          |
| miR-1915     | 2Gy                  | 1h  | gamma                        | CD34+                       | - | Li, Ha 2012            |
| miR-1976     | 2Gy                  | 1h  | gamma                        | CD34+                       | + | Li, Ha 2012            |
| miR-2137     | 4.3Gy                | 24h | <sup>177</sup> Lu-octreotate | mouse renal cortical tissue | - | present study          |
| miR-2861     | 2Gy                  | 1h  | gamma                        | CD34+                       | - | Li, Ha 2012            |
| miR-2861     | 1.3, 4.3Gy           | 24h | <sup>177</sup> Lu-octreotate | mouse renal cortical tissue | + | present study          |
| miR-3074     | 8Gy                  | 1h  | gamma                        | hFOB                        | - | Li, Ha 2012            |
| miR-3076-3p  | 2 Gy                 | 4h  | proton                       | Mouse brain                 | - | Khan, Tariq 2013       |
| miR-3077-5p  | 0.34, 1.3, 4.3, 13Gy | 24h | <sup>177</sup> Lu-octreotate | mouse renal cortical tissue | + | present study          |
| miR-3084-3p  | 0.34, 4.3Gy          | 24h | <sup>177</sup> Lu-octreotate | mouse renal cortical tissue | + | present study          |
| miR-3090-5p  | 0.34, 1.3, 4.3, 13Gy | 24h | <sup>177</sup> Lu-octreotate | mouse renal cortical tissue | + | present study          |
| miR-3096b-3p | 13Gy                 | 24h | <sup>177</sup> Lu-octreotate | mouse renal cortical tissue | + | present study          |
| miR-3102-5p  | 0.34, 4.3, 13Gy      | 24h | <sup>177</sup> Lu-octreotate | mouse renal cortical tissue | + | present study          |
| miR-3141     | 2Gy                  | 1h  | gamma                        | CD34+                       | - | Li, Ha 2012            |
| miR-3185     | 8Gy                  | 1h  | gamma                        | hFOB                        | + | Li, Ha 2012            |
| miR-3196     | 2Gy                  | 1h  | gamma                        | CD34+                       | - | Li, Ha 2012            |
| miR-3470a    | 2 Gy                 | 4h  | proton                       | Mouse liver                 | + | Khan, Tariq 2013       |
| miR-3470b    | 2 Gy                 | 4h  | proton                       | Mouse liver                 | + | Khan, Tariq 2013       |
| miR-3473b    | 2 Gy                 | 4h  | proton                       | Mouse liver                 | + | Khan, Tariq 2013       |



|             |                 |     |                              |                             |   |               |
|-------------|-----------------|-----|------------------------------|-----------------------------|---|---------------|
| miR-4267    | 8Gy             | 1h  | gamma                        | hFOB                        | - | Li, Ha 2012   |
| miR-4281    | 2Gy             | 1h  | gamma                        | CD34+                       | - | Li, Ha 2012   |
| miR-4298    | 8Gy             | 1h  | gamma                        | hFOB                        | + | Li, Ha 2012   |
| miR-5126b   | 8Gy             | 1h  | gamma                        | hFOB                        | - | Li, Ha 2012   |
| miR-5627-5p | 4.3Gy           | 24h | <sup>177</sup> Lu-octreotate | mouse renal cortical tissue | + | present study |
| miR-6239    | 13Gy            | 24h | <sup>177</sup> Lu-octreotate | mouse renal cortical tissue | - | present study |
| miR-6240    | 4.3Gy           | 24h | <sup>177</sup> Lu-octreotate | mouse renal cortical tissue | + | present study |
| miR-6244    | 0.34, 4.3, 13Gy | 24h | <sup>177</sup> Lu-octreotate | mouse renal cortical tissue | + | present study |
| miR-6402    | 1.3, 4.3, 13Gy  | 24h | <sup>177</sup> Lu-octreotate | mouse renal cortical tissue | + | present study |
| miR-6538    | 13Gy            | 24h | <sup>177</sup> Lu-octreotate | mouse renal cortical tissue | + | present study |

Cha, H. J., K. M. Seong, S. Bae, J. H. Jung, C. S. Kim, K. H. Yang, Y. W. Jin and S. An (2009). "Identification of specific microRNAs responding to low and high dose gamma-irradiation in the human lymphoblast line IM9." Oncol Rep **22**(4): 863-868.

Cha, H. J., S. Shin, H. Yoo, E. M. Lee, S. Bae, K. H. Yang, S. J. Lee, I. C. Park, Y. W. Jin and S. An (2009). "Identification of ionizing radiation-responsive microRNAs in the IM9 human B lymphoblastic cell line." Int J Oncol **34**(6): 1661-1668.

Chen, G., W. Zhu, D. Shi, L. Lv, C. Zhang, P. Liu and W. Hu (2010). "MicroRNA-181a sensitizes human malignant glioma U87MG cells to radiation by targeting Bcl-2." Oncol Rep **23**(4): 997-1003.

Dickey, J. S., F. J. Zemp, O. A. Martin and O. Kovalchuk (2011). "The role of miRNA in the direct and indirect effects of ionizing radiation." Radiat Environ Biophys **50**(4): 491-499.

Girardi, C., C. De Pitta, S. Casara, G. Sales, G. Lanfranchi, L. Celotti and M. Mognato (2012). "Analysis of miRNA and mRNA expression profiles highlights alterations in ionizing radiation response of human lymphocytes under modeled microgravity." PLoS One **7**(2): e31293.

Hu, Z., Y. Tie, G. Lü, H. Fu, R. Xing, J. Zhu, Z. Sun and X. Zheng (2013). "Correlation of microRNAs responding to high dose  $\gamma$ -irradiation with predicted target mRNAs in HeLa cells using microarray analyses." Chinese Science Bulletin **58**(36): 4622-4629.

Ilnytskyy, Y., F. J. Zemp, I. Koturbash and O. Kovalchuk (2008). "Altered microRNA expression patterns in irradiated hematopoietic tissues suggest a sex-specific protective mechanism." Biochem Biophys Res Commun **377**(1): 41-45.

Joly-Tonetti, N., J. Vinuelas, O. Gandrillon and J. Lamartine (2013). "Differential miRNA expression profiles in proliferating or differentiated keratinocytes in response to gamma irradiation." BMC Genomics **14**: 184.

- Josson, S., S. Y. Sung, K. Lao, L. W. Chung and P. A. Johnstone (2008). "Radiation modulation of microRNA in prostate cancer cell lines." Prostate **68**(15): 1599-1606.
- Khan, S. Y., M. A. Tariq, J. P. Perrott, C. D. Brumbaugh, H. J. Kim, M. I. Shabbir, G. T. Ramesh and N. Pourmand (2013). "Distinctive microRNA expression signatures in proton-irradiated mice." Mol Cell Biochem **382**(1-2): 225-235.
- Koturbash, I., F. Zemp, B. Kolb and O. Kovalchuk (2011). "Sex-specific radiation-induced microRNAome responses in the hippocampus, cerebellum and frontal cortex in a mouse model." Mutat Res **722**(2): 114-118.
- Leung, C. M., S. C. Li, T. W. Chen, M. R. Ho, L. Y. Hu, W. S. Liu, T. T. Wu, P. C. Hsu, H. T. Chang and K. W. Tsai (2014). "Comprehensive microRNA profiling of prostate cancer cells after ionizing radiation treatment." Oncol Rep **31**(3): 1067-1078.
- Li, B., X. B. Shi, D. Nori, C. K. Chao, A. M. Chen, R. Valicenti and V. White Rde (2011). "Down-regulation of microRNA 106b is involved in p21-mediated cell cycle arrest in response to radiation in prostate cancer cells." Prostate **71**(6): 567-574.
- Li, X. H., C. T. Ha, D. Fu and M. Xiao (2012). "Micro-RNA30c negatively regulates REDD1 expression in human hematopoietic and osteoblast cells after gamma-irradiation." PLoS One **7**(11): e48700.
- Maes, O. C., J. An, H. Sarojini, H. Wu and E. Wang (2008). "Changes in MicroRNA expression patterns in human fibroblasts after low-LET radiation." J Cell Biochem **105**(3): 824-834.
- Nikiforova, M. N., M. Gandhi, L. Kelly and Y. E. Nikiforov (2011). "MicroRNA dysregulation in human thyroid cells following exposure to ionizing radiation." Thyroid **21**(3): 261-266.
- Shin, S., H. J. Cha, E. M. Lee, S. J. Lee, S. K. Seo, H. O. Jin, I. C. Park, Y. W. Jin and S. An (2009). "Alteration of miRNA profiles by ionizing radiation in A549 human non-small cell lung cancer cells." Int J Oncol **35**(1): 81-86.
- Simone, N. L., B. P. Soule, D. Ly, A. D. Saleh, J. E. Savage, W. Degraff, J. Cook, C. C. Harris, D. Gius and J. B. Mitchell (2009). "Ionizing radiation-induced oxidative stress alters miRNA expression." PLoS One **4**(7): e63777.
- Templin, T., S. A. Amundson, D. J. Brenner and L. B. Smilenov (2011). "Whole mouse blood microRNA as biomarkers for exposure to gamma-rays and (56)Fe ion." Int J Radiat Biol **87**(7): 653-662.
- Templin, T., S. Paul, S. A. Amundson, E. F. Young, C. A. Barker, S. L. Wolden and L. B. Smilenov (2011). "Radiation-induced micro-RNA expression changes in peripheral blood cells of radiotherapy patients." Int J Radiat Oncol Biol Phys **80**(2): 549-557.
- Templin, T., E. F. Young and L. B. Smilenov (2012). "Proton radiation-induced miRNA signatures in mouse blood: characterization and comparison with 56Fe-ion and gamma radiation." Int J Radiat Biol **88**(7): 531-539.
- Wagner-Ecker, M., C. Schwager, U. Wirkner, A. Abdollahi and P. E. Huber (2010). "MicroRNA expression after ionizing radiation in human endothelial cells." Radiat Oncol **5**: 25.

Weidhaas, J. B., I. Babar, S. M. Nallur, P. Trang, S. Roush, M. Boehm, E. Gillespie and F. J. Slack (2007). "MicroRNAs as potential agents to alter resistance to cytotoxic anticancer therapy." Cancer Res **67**(23): 11111-11116.
